# Supplementary material for: Functional Verification of Two Genes Related to Stripe Rust Resistance in the Wheat-Leymus mollis Introgression Line M8664-3
Source: PubMed Central journal article supplement (PMC8574815; doi:10.3389/fpls.2021.754823), 2021-10-25
Supplement: Data_Sheet_1.pdf [file Data_Sheet_1.pdf]

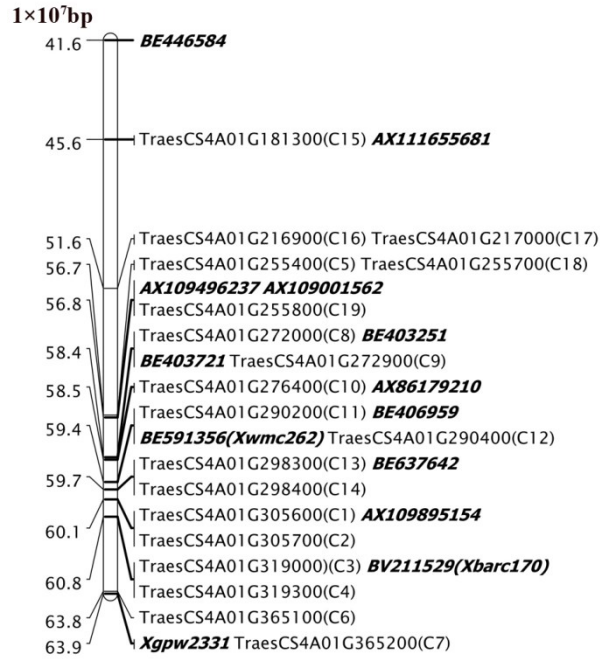

**Physical integration map**

**Supplementary Figure S1.** Physical integration map of candidate genes and markers linked to resistance gene *YrM86664-3*. Markers and candidate genes are shown on the right and their position on chromosome 4A of the IWGSC-RefSeq database are shown on the left. The numeric unit is  $1 \times 10^7$  bp.

A

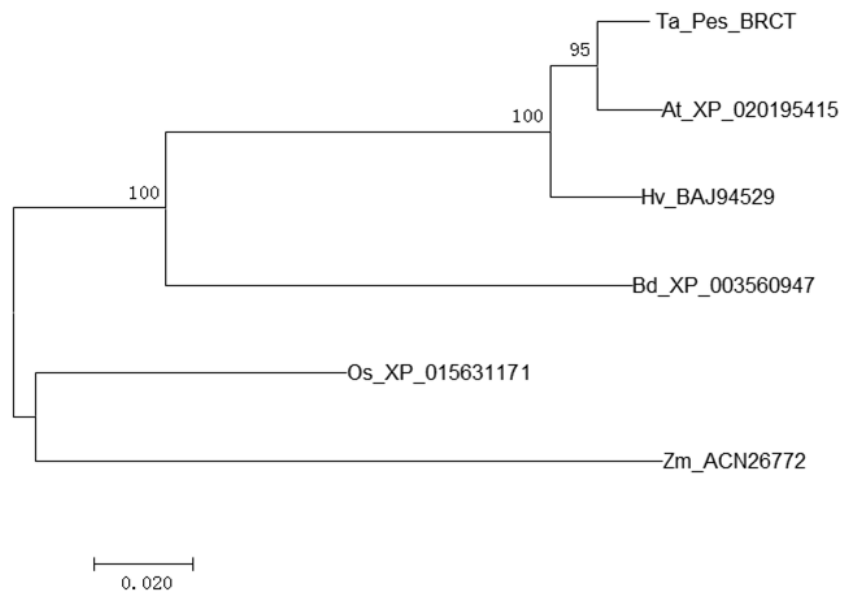

B

Ta\_Pes\_BRCT MPKHYRPAKKKEGNAAKYITRTKAVSYLQISLAVFRKLCILKGVFPREPKKKVEGNHKTYHMKDIAFLAHDLPIEKF  
Hv\_BAJ94529 MPKHYRPAKKKEGNAAKYITRTKAVSYLQISLAVFRKLCILKGVFPREPKKKVEGNHKTYHMKDIAFLAHDLPIEKF  
Bd\_XP\_003560947 MPKHYRPAKKKEGNAAKYITRTKAVSYLQISLAVFRKLCILKGVFPREPKKKVEGNHKTYHMKDIAFLAHDLPIEKF  
Os\_XP\_015631171 MPKHYRPAKKKEGNAAKYITRTKAVSYLQISLAVFRKLCILKGVFPREPKKKVEGNHKTYHMKDIAFLAHDLPIEKF  
Zm\_ACN26772 MPKHYRPAKKKEGNAAKYITRTKAVSYLQISLAVFRKLCILKGVFPREPKKKVEGNHKTYHMKDIAFLAHDLPIEKF  
At\_XP\_020195415 MPKHYRPAKKKEGNAAKYITRTKAVSYLQISLAVFRKLCILKGVFPREPKKKVEGNHKTYHMKDIAFLAHDLPIEKF

Ta\_Pes\_BRCT REIKVHRKVKKAMAKKNRDLADRLLRNPPTYKLDRLIERYPSEFVDALRDLDDCLTMVHLFAALPAIEGERVQVQRIH  
Hv\_BAJ94529 REIKVHRKVKKAMAKKNRDLADRLLRNPPTYKLDRLIERYPSEFVDALRDLDDCLTMVHLFAALPAIEGERVQVQRIH  
Bd\_XP\_003560947 REIKVHRKVKKAMAKKNRDLADRLLRNPPTYKLDRLIERYPSEFVDALRDLDDCLTMVHLFAALPAIEGERVQVQRIH  
Os\_XP\_015631171 REIKVHRKVKKAMAKKNRDLADRLLRNPPTYKLDRLIERYPSEFVDALRDLDDCLTMVHLFAALPAIEGERVQVQRIH  
Zm\_ACN26772 REIKVHRKVKKAMAKKNRDLADRLLRNPPTYKLDRLIERYPSEFVDALRDLDDCLTMVHLFAALPAIEGERVQVQRIH  
At\_XP\_020195415 REIKVHRKVKKAMAKKNRDLADRLLRNPPTYKLDRLIERYPSEFVDALRDLDDCLTMVHLFAALPAIEGERVQVQRIH

Ta\_Pes\_BRCT NCRRLSHEWQAYISRTNSLRKTFISVKGIIYQAEVQGQKITWLTTPHALQQVLTDDVDFNVMLTFLEFYETLLGFVNFKL  
Hv\_BAJ94529 NCRRLSHEWQAYISRTNSLRKTFISVKGIIYQAEVQGQKITWLTTPHALQQVLTDDVDFNVMLTFLEFYETLLGFVNFKL  
Bd\_XP\_003560947 NCRRLSHEWQAYISRTNSLRKTFISVKGIIYQAEVQGQKITWLTTPHALQQVLTDDVDFNVMLTFLEFYETLLGFVNFKL  
Os\_XP\_015631171 NCRRLSHEWQAYISRTNSLRKTFISVKGIIYQAEVQGQKITWLTTPHALQQVLTDDVDFNVMLTFLEFYETLLGFVNFKL  
Zm\_ACN26772 NCRRLSHEWQAYISRTNSLRKTFISVKGIIYQAEVQGQKITWLTTPHALQQVLTDDVDFNVMLTFLEFYETLLGFVNFKL  
At\_XP\_020195415 NCRRLSHEWQAYISRTNSLRKTFISVKGIIYQAEVQGQKITWLTTPHALQQVLTDDVDFNVMLTFLEFYETLLGFVNFKL

Ta\_Pes\_BRCT YHSINVNYPPFLDRLRLEALAEALYALSRYSMSG..RLPGNPESNGFIEGKETEN.....NKES  
Hv\_BAJ94529 YHSINVNYPPFLDRLRLEALAEALYALSRYSMSG..RLPGNPESNGFIEGKETEN.....DKES  
Bd\_XP\_003560947 YHSINVNYPPFLDRLRLEALAEALYALSRYSMSG..RLPGNPEETNGLIKDKETEN.....NEEG  
Os\_XP\_015631171 YHSINVNYPPFLDRLRLEALAEALYALSRYSMSG..RVPGNSEPAGLIEDKEGED.....NKES  
Zm\_ACN26772 YHSINVNYPPFLDRLRLEALAEALYALSRYSMSG..RVMIGNSQTDVEMEDKDEKS.....KAEVVIKEEKVVKNKAS  
At\_XP\_020195415 YHSINVNYPPFLDRLRLEALAEALYALSRYSMSG..RLPGNPESNGLIEDKETEN.....NKES

Ta\_Pes\_BRCT SKTDESELRLAQLQHLPANEPGALMLVLEBESTADDTTEESVKECRITLFDKDMKFYLSREVPRESLLFIIIPAFGGTVSWE  
Hv\_BAJ94529 SKTDESELRLAQLQHLPANEPGALMLVLEBESTADDTTEESVKECRITLFDKDMKFYLSREVPRESLLFIIIPAFGGTVSWE  
Bd\_XP\_003560947 SKTDESELRLAQLQHLPANEPGALMLVLEBESTADDTTEESVKECRITLFDKDMKFYLSREVPRESLLFIIIPAFGGTVSWE  
Os\_XP\_015631171 SKTDESELRLAQLQHLPANEPGALMLVLEBESTADDTTEESVKECRITLFDKDMKFYLSREVPRESLLFIIIPAFGGTVSWE  
Zm\_ACN26772 SKADESELRLAQLQHLPANEPGALMLVLEBESTADDTTEESVKECRITLFDKDMKFYLSREVPRESLLFIIIPAFGGTVSWE  
At\_XP\_020195415 SKTDESELRLAQLQHLPANEPGALMLVLEBESTADDTTEESVKECRITLFDKDMKFYLSREVPRESLLFIIIPAFGGTVSWE

Ta\_Pes\_BRCT GEGAPFDETDODITHQIVDRPTQSHVFLSRHYVQPQWIFDCVNIILKVIPTDDYIVGRVPPPHISPFVDNDKEGHIIPDYA  
Hv\_BAJ94529 GEGAPFDETDODITHQIVDRPTQSHVFLSRHYVQPQWIFDCVNIILKVIPTDDYIVGRVPPPHISPFVDNDKEGHIIPDYA  
Bd\_XP\_003560947 GEGAPFDETDODITHQIVDRPTQSHVFLSRHYVQPQWIFDCVNIILKVIPTDDYIVGRVPPPHISPFVDNDKEGHIIPDYA  
Os\_XP\_015631171 GEGAPFDETDODITHQIVDRPTQSHVFLSRHYVQPQWIFDCVNIILKVIPTDDYIVGRVPPPHISPFVDNDKEGHIIPDYA  
Zm\_ACN26772 GEGAPFDETDODITHQIVDRPTQSHVFLSRHYVQPQWIFDCVNIILKVIPTDDYIVGRVPPPHISPFVDNDKEGHIIPDYA  
At\_XP\_020195415 GEGAPFDETDODITHQIVDRPTQSHVFLSRHYVQPQWIFDCVNIILKVIPTDDYIVGRVPPPHISPFVDNDKEGHIIPDYA

Ta\_Pes\_BRCT VTLEG.YKSAQGNQVMPLPGLGDEDLGSS...IIVEA...KSEHNEFAQKKRELEMCKEKKYHEELKMEIEGTTFSN.LSN  
Hv\_BAJ94529 VTLEK.YKSAQGNQVMPLP...GDEDLGNS...IIVEA...KSEHNEFAQKKRELEMCKEKKYHEELKMEIEGTTFSN.LSN  
Bd\_XP\_003560947 EKILKRLRAASKDKVLPPLPGLGDEDLGNS...MVDA...RSEYNEVAEKRRKLDMLEKQYHEELKMEIEGTTFSN.LAN  
Os\_XP\_015631171 ETIKR.LQAARNEVLPPLPGLGDEDLGNS...IIVEA...KSEHNEFAQKKRELEMCKEKKYHEELKMEIEGTTFSN.RTA  
Zm\_ACN26772 ETIKR.LQAARNEVLPPLPGLGDEDLGNS...IIVEA...KSEHNEFAQKKRELEMCKEKKYHEELKMEIEGTTFSN.LSN  
At\_XP\_020195415 VTLEG.YKSAQGNQVMPLPGLGDEDLGNS...IIVEA...KSEHNEFAQKKRELEMCKEKKYHEELKMEIEGTTFSN.LSN

Ta\_Pes\_BRCT KKADSAADVADDE.....EKAALAEQAEKDADDIAKSVVSRKKRGLMEAMKISNDRKKSKEVLLKQRKKAABSSASAK  
Hv\_BAJ94529 KKADSAADVADDE.....TQAAVEQAEKDADDIAKSVVSRKKRGLMEAMKISNDRKKSKEVLLKQRKKAABSSASAK  
Bd\_XP\_003560947 KKGDNETHAVNDNAHAANDQVDDLVEQAKDEAEMSKSFVSNKTEGLIRATEINKEKRSNVLLKRRKKAABSSASAK  
Os\_XP\_015631171 DNQPDVVDKSDTKHEAD..DHMEDSHKQAEKDAADISKTLMSRKORGILQATEINQERKKDKVNLKRRKKNADSSASAK  
Zm\_ACN26772 KEADKSPN..AKDDTQS.DREEDASKQEEEDDDDIGTALMSRKORGILYKAMKMGKEKKEKVEVLLKRRKKNADSSASAK  
At\_XP\_020195415 KKADSAADVADDE.....AQAALAEQAEKDADDIAKSVVSRKKRGLMEAMQISNDRKKSKEVLLKQRKKAABSSASAK

Ta\_Pes\_BRCT RR  
Hv\_BAJ94529 RR  
Bd\_XP\_003560947 RK  
Os\_XP\_015631171 GR  
Zm\_ACN26772 KRH  
At\_XP\_020195415 AKR

**Supplementary Figure S2.** (A) Phylogenetic analysis of Pes\_BRCT proteins. A neighbor-joining tree of Pes\_BRCT in *Triticum aestivum* (Ta\_Pes\_BRCT, KAF7044273), *Arabidopsis thaliana* (At\_XP\_020195415, XP\_020195415), *Hordeum vulgare* (Hv\_BAJ94529, BAJ94529), *B. distachyon*

(Bd\_XP\_003560947, XP\_003560947), *Oryza sativa* (Os\_XP\_015631171, XP\_015631171), and *Zea mays* (Zm\_ACN26772, ACN26772). (B) Multiple amino acid sequence alignment of Ta\_Pes\_BRCT with At\_XP\_020195415, Hv\_BAJ94529, Bd\_XP\_003560947, Os\_XP\_015631171, and Zm\_ACN26772. Amino acid identity (black boxes) and similarity (gray boxes) are shown within the protein kinase domain.

## 2.2 Supplementary Tables

**Supplementary Table S1.** Primers used in this study.

|     | Gene               | qPCR F                      | qPCR R                       | VIGS F                       | VIGS R                       | complete sequence F     | complete sequence R          |
|-----|--------------------|-----------------------------|------------------------------|------------------------------|------------------------------|-------------------------|------------------------------|
| C1  | TraesCS4A01G305600 | GTCTCGGCAATAAT<br>AAACT     | CTAAGCCACTCTGG<br>AAAA       | TTCCCAACTCGGTAA<br>TCT       | TTCGGTATCAAAC<br>CCACA       | AAGACTTGGGAAT<br>AGCAT  | AAGAAGATAATC<br>AATGCG       |
| C2  | TraesCS4A01G305700 | TTTCCGTAACCAAA<br>TCTC      | TTGTAAAGTTGCAT<br>GTCTT      |                              |                              |                         |                              |
| C3  | TraesCS4A01G319000 | ATGGAAGCGACAT<br>CGTGAC     | CGGAACTGGAATAC<br>ATTGACCT   | CGAGCAGCAAGGGCA<br>GGT       | GCAGGAACATCTT<br>CAAGTAGTCAA |                         |                              |
| C4  | TraesCS4A01G319300 | ATCAGCAGTTATCC<br>AGCGT     | ATCAGCGACCTCGG<br>TTATG      | TGCTTCGCTTTCTGTT<br>CG       | GCATATTTGTCAGC<br>ACCTC      |                         |                              |
| C5  | TraesCS4A01G255400 | TGCGAGGCCAAGA<br>AGAGCG     | CGACCAGTACCCGT<br>CCACCA     |                              |                              |                         |                              |
| C6  | TraesCS4A01G365100 | TACAGTAATGCCA<br>AACAGG     | GACTCCAGGAACAG<br>TATGAA     |                              |                              |                         |                              |
| C7  | TraesCS4A01G365200 | TCACAAGGGGATG<br>TTGAAAGC   | AGGGAAAAGTTGGC<br>GCAGT      | CGTTCTCATCCACAA<br>GTCTA     | TCATACAGGCACA<br>GGACC       |                         |                              |
| C8  | TraesCS4A01G272000 | GCCATACGGGATG<br>ATTTAC     | GCCACTTCCAGGTG<br>CTTT       | GCCGCCTCCTCGTCTT<br>CC       | GCTCCCCTTGGCCG<br>TTGA       | ATGGCGCTGGTCT<br>CGCTC  | TTACAACGGAACT<br>CGGTATAATGG |
| C9  | TraesCS4A01G272900 | AACTCAGCAACAG<br>AGCCTTACA  | AGTGAACCTGGGCA<br>ACCT       | ACCAACTCAACTGAA<br>GACCAAGCA | ACATCCCCGACGG<br>CACGA       |                         |                              |
| C10 | TraesCS4A01G276400 | GGAGGAACTGTTT<br>CGTGGG     | GTTTGAACATAATG<br>CCTGGAG    | CGCCGTCTTCAGAAA<br>CTA       | ATGTGGAGTAAGC<br>CAAGTG      | ATGCCGAAGCACT<br>ACCGCC | TCAGCGACGTTTG<br>GCAGAA      |
| C11 | TraesCS4A01G290200 | GACAGTGATTCGTC<br>GGATAACAA | CCACCGCACAAAGCC<br>AAGGG     |                              |                              |                         |                              |
| C12 | TraesCS4A01G290400 | AGTAGCAGAGCCA<br>GCAAAACC   | GCTCCGTGGGAAGC<br>AATCT      |                              |                              |                         |                              |
| C13 | TraesCS4A01G298300 | GGCAAGGACGGGT<br>CTCACA     | CGCAAAGCAAGCC<br>AGCATC      | AAAGCCGTCCCCTTC<br>CGC       | GGTAATAGACCCC<br>GAAGGAATG   |                         |                              |
| C14 | TraesCS4A01G298400 | TGGTGGGGCTGGG<br>GCTAT      | AAGAAGGTGAGGT<br>AGATGACGATG |                              |                              |                         |                              |
| C15 | TraesCS4A01G181300 | GCTCGCACCTATGA<br>TCTCGC    | CCTATCCTCGCCTC<br>CCACC      | CGGCGTCTGTTTCGCT<br>TCC      | CGCTACCGCAGCC<br>TATCC       |                         |                              |
| C16 | TraesCS4A01G216900 | CGGTGCCGTCGTCC<br>AAGAT     | ACCACCACCCGAGT<br>GCGATAT    |                              |                              |                         |                              |
| C17 | TraesCS4A01G217000 | GGCGTCCTCGGGG<br>CTCTTT     | GCGGTCATGTCGTC<br>GTCCA      |                              |                              |                         |                              |
| C18 | TraesCS4A01G255700 | CTCCTCACGCTCTT<br>TCCCA     | TAGATGCCGCCCT<br>GAAG        |                              |                              |                         |                              |
| C19 | TraesCS4A01G255800 | TGCCAGAGCAAGA<br>AGGAATC    | AGGGTGTCTCGGAC<br>GCTTA      |                              |                              |                         |                              |

**Supplementary Table S2.** Candidate genes and markers linked to resistance genes *YrM86664-3* on chromosome 4AL.

| Position (bp)       | No. of selected genes /<br>Markers of <i>YrM8664-3</i> | Gene accession     | Annotation                                                            |
|---------------------|--------------------------------------------------------|--------------------|-----------------------------------------------------------------------|
| 415683496-415683891 | <i>BE446584</i>                                        |                    |                                                                       |
| 456290064-456292784 | C15                                                    | TraesCS4A01G181300 | AP2-like ethylene-responsive transcription factor                     |
| 456292321-456292391 | <i>AX111655681</i>                                     |                    |                                                                       |
| 456293850-456294616 |                                                        | TraesCS4A01G181400 | Calcium-binding protein                                               |
| 456336315-456336770 |                                                        | TraesCS4A01G181500 | Calcium-binding protein                                               |
| 456436432-456437241 |                                                        | TraesCS4A01G181600 | Germin-like protein                                                   |
| 456449294-456449968 |                                                        | TraesCS4A01G181700 | Germin-like protein 1-1                                               |
| 456454952-456456006 |                                                        | TraesCS4A01G181800 | Germin-like protein                                                   |
| 456459540-456460466 |                                                        | TraesCS4A01G181900 | Germin-like protein 1-1                                               |
| 456479864-456482398 |                                                        | TraesCS4A01G182000 | transmembrane protein, putative (Protein of unknown function, DUF538) |
| 456483993-456489034 |                                                        | TraesCS4A01G182100 | tRNA (Ile)-lysidine synthase                                          |
| 457568303-457568758 |                                                        | TraesCS4A01G182200 | Calcium-binding protein                                               |
| 457826318-457836526 |                                                        | TraesCS4A01G182300 | Clathrin heavy chain                                                  |
| 458233726-458261311 |                                                        | TraesCS4A01G182400 | Proline-, glutamic acid-and leucine-rich protein 1                    |

---

|                     |                    |                                                           |
|---------------------|--------------------|-----------------------------------------------------------|
| 458517792-458534396 | TraesCS4A01G182500 | Proline-, glutamic acid-and leucine-rich protein 1        |
| 458856406-458858932 | TraesCS4A01G182600 | 60S ribosomal protein L44                                 |
| 459627628-459631283 | TraesCS4A01G182700 | Omega-3 fatty acid desaturase                             |
| 459631134-459637226 | TraesCS4A01G182800 | Chaperone ClpB                                            |
| 460229896-460238212 | TraesCS4A01G182900 | E3 SUMO-protein ligase SIZ1                               |
| 460238966-460240171 | TraesCS4A01G183000 | Kinase family protein                                     |
| 460448898-460449233 | TraesCS4A01G183100 | Protein transport protein Sec61 subunit beta, putative    |
| 460451001-460454968 | TraesCS4A01G183200 | RNA-directed DNA methylation 4                            |
| 460459288-460460764 | TraesCS4A01G183300 | Alpha/beta-Hydrolases superfamily protein, putative       |
| 460897370-460902867 | TraesCS4A01G183400 | transcription factor-like protein                         |
| 460903866-460904732 | TraesCS4A01G183500 | Membrane-associated phospholipid phosphatase              |
| 461353961-461355490 | TraesCS4A01G183600 | Cytochrome P450                                           |
| 462201615-462203147 | TraesCS4A01G183700 | RING/U-box superfamily protein                            |
| 462202745-462205391 | TraesCS4A01G183800 | caspase-6 protein                                         |
| 462204109-462205056 | TraesCS4A01G183900 | DUF868 family protein                                     |
| 462210624-462211955 | TraesCS4A01G184000 | Seipin                                                    |
| 462212695-462216068 | TraesCS4A01G184100 | 2,3-bisphosphoglycerate-dependent phosphoglycerate mutase |

---

---

|                     |                    |                                                          |
|---------------------|--------------------|----------------------------------------------------------|
| 462216501-462219266 | TraesCS4A01G184200 | ATP-dependent RNA helicase                               |
| 462219982-462224642 | TraesCS4A01G184300 | myosin-4 protein (DUF641)                                |
| 462309235-462309875 | TraesCS4A01G184400 | SKP1-interacting partner 15                              |
| 462825330-462834056 | TraesCS4A01G184500 | Nucleosome-remodeling factor subunit BPTF                |
| 463543053-463543944 | TraesCS4A01G184600 | stress response NST1-like protein                        |
| 463923382-463925340 | TraesCS4A01G184700 | Heavy metal transport/detoxification superfamily protein |
| 464110898-464112499 | TraesCS4A01G184800 | R3H domain protein                                       |
| 464549148-464568089 | TraesCS4A01G184900 | Long-Chain Acyl-CoA Synthetase                           |
| 464685913-464691515 | TraesCS4A01G185000 | Protein Red                                              |
| 464692585-464694075 | TraesCS4A01G185100 | Structure-specific endonuclease subunit slx1             |
| 464696741-464696962 | TraesCS4A01G185200 | Ubiquitin-like protein 5                                 |
| 464762884-464764368 | TraesCS4A01G185300 | Glycosyltransferase                                      |
| 464767703-464771611 | TraesCS4A01G185400 | DNA-directed RNA polymerase II, putative                 |
| 464989058-464989620 | TraesCS4A01G185500 | RING/U-box superfamily protein, putative                 |
| 464989922-464994481 | TraesCS4A01G185600 | Phosphatidylinositol-4-phosphate 5-kinase 4, putative    |
| 465006134-465006929 | TraesCS4A01G185700 | RING/U-box superfamily protein, putative                 |
| 465223300-465223743 | TraesCS4A01G185800 | RING/U-box superfamily protein                           |

---

---

|                     |                    |                                                                |
|---------------------|--------------------|----------------------------------------------------------------|
| 465226193-465228911 | TraesCS4A01G185900 | Scarecrow-like transcription factor 3 family protein           |
| 465275101-465276978 | TraesCS4A01G186000 | Pentatricopeptide repeat-containing family protein             |
| 465326992-465330134 | TraesCS4A01G186100 | Calcium-binding EF-hand protein                                |
| 465403704-465408630 | TraesCS4A01G186200 | RNA-binding protein                                            |
| 465408869-465411396 | TraesCS4A01G186300 | 50S ribosomal protein L24                                      |
| 465523379-465524129 | TraesCS4A01G186400 | Invertase/pectin methylesterase inhibitor family protein       |
| 465526094-465533623 | TraesCS4A01G186500 | Alpha-L-arabinofuranosidase 1                                  |
| 465535456-465536736 | TraesCS4A01G186600 | Ubiquitin carboxyl-terminal hydrolase family protein           |
| 465542897-465545035 | TraesCS4A01G186700 | Serine/threonine-protein kinase                                |
| 465790367-465790657 | TraesCS4A01G186800 | Phytosulfokines 3                                              |
| 465794366-465799828 | TraesCS4A01G186900 | Heme oxygenase 1 protein                                       |
| 465890222-465892744 | TraesCS4A01G187000 | Serine/threonine-protein kinase                                |
| 465893542-465899342 | TraesCS4A01G187100 | Glutamine--fructose-6-phosphate aminotransferase [isomerizing] |
| 466107721-466111852 | TraesCS4A01G187200 | Rhamnogalacturonate lyase                                      |
| 466571843-466575387 | TraesCS4A01G187300 | Non-specific serine/threonine protein kinase                   |
| 466632749-466636729 | TraesCS4A01G187400 | WD-repeat protein, putative                                    |
| 466638350-466644033 | TraesCS4A01G187500 | Protein ZINC INDUCED FACILITATOR-LIKE 1                        |

---



---

|                     |                    |                                                             |
|---------------------|--------------------|-------------------------------------------------------------|
| 466648899-466656351 | TraesCS4A01G187600 | Protein ZINC INDUCED FACILITATOR-LIKE 1                     |
| 466910566-466916544 | TraesCS4A01G187700 | Protein ZINC INDUCED FACILITATOR-LIKE 1                     |
| 466922580-466924670 | TraesCS4A01G187800 | 4'-phosphopantetheinyl transferase family protein           |
| 466925867-466928007 | TraesCS4A01G187900 | Calcium-dependent protein kinase                            |
| 466929045-466934390 | TraesCS4A01G188000 | S-locus lectin protein kinase family protein                |
| 466938805-466941669 | TraesCS4A01G188100 | Auxin efflux carrier component                              |
| 467142674-467145702 | TraesCS4A01G188200 | weak chloroplast movement under blue light protein (DUF827) |
| 467245403-467251748 | TraesCS4A01G188300 | Alpha-L-arabinofuranosidase 1                               |
| 467258814-467260581 | TraesCS4A01G188400 | Mitochondrial import inner membrane translocase subunit     |
| 467264938-467266728 | TraesCS4A01G188500 | Pentatricopeptide repeat-containing protein                 |
| 467311125-467312751 | TraesCS4A01G188600 | Lactation elevated protein 1                                |
| 467516912-467538652 | TraesCS4A01G188700 | Regulation of nuclear pre-mRNA domain-containing protein 1B |
| 467539358-467539961 | TraesCS4A01G188800 | Nuclear-interacting partner of ALK                          |
| 467543882-467547234 | TraesCS4A01G188900 | ELMO domain containing protein                              |
| 467681716-467686145 | TraesCS4A01G189000 | NAD(P)-binding Rossmann-fold superfamily protein            |
| 468147360-468160559 | TraesCS4A01G189100 | Methyl esterase                                             |
| 468207784-468209254 | TraesCS4A01G189200 | 50S ribosomal protein L2                                    |

---

---

|                     |                    |                                                             |
|---------------------|--------------------|-------------------------------------------------------------|
| 468210429-468210704 | TraesCS4A01G189300 | B3 domain-containing protein                                |
| 468214233-468214691 | TraesCS4A01G189400 | Serine/threonine-protein phosphatase 4 regulatory subunit 3 |
| 468247494-468247931 | TraesCS4A01G189500 | Retrotransposon protein, putative, unclassified             |
| 468248620-468251401 | TraesCS4A01G189600 | Type I inositol-1,4,5-trisphosphate 5-phosphatase           |
| 468603186-468604307 | TraesCS4A01G189700 | Myb factor                                                  |
| 468624255-468625997 | TraesCS4A01G189800 | Transposon Ty3-G Gag-Pol polyprotein                        |
| 468627132-468628964 | TraesCS4A01G189900 | Cell division control protein 45-like protein               |
| 468652211-468652723 | TraesCS4A01G190000 | Ubiquitin-like-specific protease ESD4-like protein          |
| 468752522-468754917 | TraesCS4A01G190100 | Exostosin family protein                                    |
| 468757496-468758122 | TraesCS4A01G190200 | 30S ribosomal protein S9                                    |
| 468849301-468849665 | TraesCS4A01G190300 | Ribonuclease H-like superfamily protein                     |
| 469101407-469106508 | TraesCS4A01G190400 | Zeaxanthin epoxidase, chloroplastic                         |
| 469101882-469102650 | TraesCS4A01G190500 | 30S ribosomal protein S9                                    |
| 469240692-469243251 | TraesCS4A01G190600 | 2-C-methyl-D-erythritol 4-phosphate cytidyltransferase      |
| 469244809-469246370 | TraesCS4A01G190700 | Dirigent protein                                            |
| 469512189-469515279 | TraesCS4A01G190800 | RNA-binding domain CCCH-type zinc finger protein            |
| 469829765-469839951 | TraesCS4A01G190900 | 33 kDa chaperonin                                           |

---

---

|                     |                    |                                                                               |
|---------------------|--------------------|-------------------------------------------------------------------------------|
| 470097916-470100678 | TraesCS4A01G191000 | Pentatricopeptide repeat-containing protein                                   |
| 470136300-470138148 | TraesCS4A01G191100 | Calcium uniporter protein, mitochondrial                                      |
| 470568648-470572941 | TraesCS4A01G191200 | NAD(P)-binding Rossmann-fold superfamily protein                              |
| 470687270-470689755 | TraesCS4A01G191300 | Scarecrow transcription factor family protein                                 |
| 471695861-471712108 | TraesCS4A01G191400 | Ethanolamine-phosphate cytidyltransferase                                     |
| 471917815-471921872 | TraesCS4A01G191500 | Kinase family protein                                                         |
| 471929454-471929858 | TraesCS4A01G191600 | P-loop containing nucleoside triphosphate hydrolases superfamily protein      |
| 471930743-471933286 | TraesCS4A01G191700 | Bis(5'-adenosyl)-triphosphatase                                               |
| 471937946-471938830 | TraesCS4A01G191800 | Retrotransposon protein, putative, unclassified                               |
| 472194252-472198000 | TraesCS4A01G191900 | S-acyltransferase                                                             |
| 472398571-472399305 | TraesCS4A01G192000 | LURP-one-like protein                                                         |
| 472613393-472616378 | TraesCS4A01G192100 | DUF936 family protein                                                         |
| 472648853-472651264 | TraesCS4A01G192200 | GH3 family protein                                                            |
| 472918003-472921049 | TraesCS4A01G192300 | Protein kinase                                                                |
| 472922679-472923350 | TraesCS4A01G192400 | Late embryogenesis abundant hydroxyproline-rich glycoprotein family, putative |
| 472963183-472965902 | TraesCS4A01G192500 | Cytochrome P450-like protein                                                  |

---

---

|                     |                    |                                                                      |
|---------------------|--------------------|----------------------------------------------------------------------|
| 473496793-473508086 | TraesCS4A01G192600 | Coiled-coil domain-containing protein SCD2                           |
| 473686557-473689766 | TraesCS4A01G192700 | heat-inducible transcription repressor                               |
| 473765103-473767432 | TraesCS4A01G192800 | DUF1191 superfamily protein                                          |
| 473940082-473942130 | TraesCS4A01G192900 | Phototropic-responsive NPH3 family protein                           |
| 473945535-473946623 | TraesCS4A01G193000 | BTB/POZ domain containing protein, expressed                         |
| 474494136-474495065 | TraesCS4A01G193100 | Ethylene-responsive transcription factor, putative                   |
| 474740916-474742519 | TraesCS4A01G193200 | Methyl esterase 17                                                   |
| 474742975-474744402 | TraesCS4A01G193300 | Methyl esterase 17                                                   |
| 474932400-474935597 | TraesCS4A01G193400 | Wall-associated receptor kinase 5                                    |
| 475389649-475390570 | TraesCS4A01G193500 | Polynucleotidyl transferase, ribonuclease H-like superfamily protein |
| 475396081-475398440 | TraesCS4A01G193600 | WRKY transcription factor                                            |
| 475418550-475423746 | TraesCS4A01G193700 | GPI transamidase component PIG-T                                     |
| 475579120-475579921 | TraesCS4A01G193800 | AMP phosphorylase                                                    |
| 475902731-475906968 | TraesCS4A01G193900 | Vacuolar sorting receptor family protein                             |
| 475910551-475914614 | TraesCS4A01G194000 | Chloroplastic outer envelope membrane protein, putative, expressed   |
| 475914952-475919117 | TraesCS4A01G194100 | Elongation factor P                                                  |
| 476065837-476066397 | TraesCS4A01G194200 | Ring finger protein, putative                                        |

---

---

|                     |                    |                                                          |
|---------------------|--------------------|----------------------------------------------------------|
| 476142148-476142510 | TraesCS4A01G194300 | Non-specific lipid-transfer protein                      |
| 476145519-476146036 | TraesCS4A01G194400 | Non-specific lipid-transfer protein                      |
| 476337610-476343287 | TraesCS4A01G194500 | MACPF domain protein                                     |
| 476345073-476346656 | TraesCS4A01G194600 | Pentatricopeptide repeat-containing protein              |
| 476744781-476752651 | TraesCS4A01G194700 | Poly (A) RNA polymerase cid14                            |
| 476979044-476980393 | TraesCS4A01G194800 | Non-specific serine/threonine protein kinase             |
| 477019716-477022706 | TraesCS4A01G194900 | NBS-LRR resistance protein                               |
| 477024828-477029268 | TraesCS4A01G195000 | ARM repeat superfamily protein                           |
| 477026271-477026606 | TraesCS4A01G195100 | Class II aaRS and biotin synthetases superfamily protein |
| 477032809-477034972 | TraesCS4A01G195200 | Methyltransferase-related protein, putative              |
| 477057713-477066814 | TraesCS4A01G195300 | Reticulocyte-binding protein 2 like a                    |
| 477307630-477313109 | TraesCS4A01G195400 | Reticulocyte-binding protein 2 like a                    |
| 477833503-477834478 | TraesCS4A01G195500 | Lipid transfer protein                                   |
| 477878202-477884489 | TraesCS4A01G195600 | ADP,ATP carrier protein                                  |
| 477886282-477888721 | TraesCS4A01G195700 | Saposin B domain-containing family protein               |
| 478191459-478192551 | TraesCS4A01G195800 | Ribosomal RNA apurinic site specific lyase-like          |
| 478209590-478216829 | TraesCS4A01G195900 | F-box family protein                                     |

---

---

|                     |                    |                                                  |
|---------------------|--------------------|--------------------------------------------------|
| 478217881-478219705 | TraesCS4A01G196000 | Peroxidase                                       |
| 478227516-478228331 | TraesCS4A01G196100 | DNA topoisomerase                                |
| 478228425-478228727 | TraesCS4A01G196200 | Cortactin-binding protein 2                      |
| 478300560-478302737 | TraesCS4A01G196300 | Peroxidase                                       |
| 478338363-478340040 | TraesCS4A01G196400 | Peroxidase                                       |
| 478742792-478743707 | TraesCS4A01G196500 | type one serine/threonine protein phosphatase 6  |
| 478746523-478747467 | TraesCS4A01G196600 | Carbonic anhydrase                               |
| 478751090-478752731 | TraesCS4A01G196700 | F-box family protein                             |
| 478866899-478868300 | TraesCS4A01G196800 | BTB/POZ domain-containing protein                |
| 479400478-479402257 | TraesCS4A01G196900 | Serine/threonine-protein kinase Haspin, putative |
| 479411679-479419052 | TraesCS4A01G197000 | XH/XS domain-containing family protein           |
| 479429746-479430999 | TraesCS4A01G197100 | F-box family protein                             |
| 479623255-479625385 | TraesCS4A01G197200 | F-box family protein                             |
| 480556438-480557244 | TraesCS4A01G197300 | F-box family protein                             |
| 481063475-481064905 | TraesCS4A01G197400 | F-box family protein                             |
| 481089393-481091981 | TraesCS4A01G197500 | Transposase                                      |
| 481409030-481415020 | TraesCS4A01G197600 | Signal recognition particle 54 kDa protein       |

---

---

|                     |                    |                                              |
|---------------------|--------------------|----------------------------------------------|
| 481416936-481420804 | TraesCS4A01G197700 | Signal recognition particle 54 kDa protein   |
| 482132676-482133512 | TraesCS4A01G197800 | Fantastic four-like protein                  |
| 482134696-482138841 | TraesCS4A01G197900 | Rho GTPase-activating protein                |
| 482391745-482392520 | TraesCS4A01G198000 | Cholesterol 7-alpha-monooxygenase            |
| 483174530-483177374 | TraesCS4A01G198100 | Transcription factor                         |
| 483382511-483383497 | TraesCS4A01G198200 | F-box protein-like                           |
| 483950328-483951403 | TraesCS4A01G198300 | B3 domain-containing protein                 |
| 484097808-484099293 | TraesCS4A01G198400 | Alpha-1,4 glucan phosphorylase               |
| 484234292-484236962 | TraesCS4A01G198500 | Lysosomal Pro-X carboxypeptidase             |
| 484672134-484673187 | TraesCS4A01G198600 | transcription repressor                      |
| 484731624-484732719 | TraesCS4A01G198700 | transcription repressor                      |
| 485278938-485284016 | TraesCS4A01G198800 | HVA22-like protein                           |
| 485284330-485285110 | TraesCS4A01G198900 | ATP binding microtubule motor family protein |
| 485458851-485461751 | TraesCS4A01G199000 | Chaperone protein ClpB                       |
| 485708491-485709243 | TraesCS4A01G199100 | Basic blue copper family protein             |
| 486124572-486126014 | TraesCS4A01G199200 | UDP-glucose 6-dehydrogenase                  |
| 486638806-486643365 | TraesCS4A01G199300 | Cyclin family protein                        |

---

---

|                     |                    |                                                                                     |
|---------------------|--------------------|-------------------------------------------------------------------------------------|
| 486646174-486648440 | TraesCS4A01G199400 | Pentatricopeptide repeat-containing protein                                         |
| 487554653-487555210 | TraesCS4A01G199500 | Phospholipid-transporting ATPase                                                    |
| 487862149-487866232 | TraesCS4A01G199600 | Cyclin family protein                                                               |
| 487868350-487868991 | TraesCS4A01G199700 | Late embryogenesis abundant (LEA) hydroxyproline-rich glycoprotein family           |
| 487890910-487892157 | TraesCS4A01G199800 | Late embryogenesis abundant (LEA) hydroxyproline-rich glycoprotein family, putative |
| 487916374-487918245 | TraesCS4A01G199900 | FBD-associated F-box protein                                                        |
| 488110321-488112219 | TraesCS4A01G200000 | Non-specific serine/threonine protein kinase                                        |
| 488252084-488257189 | TraesCS4A01G200100 | Exocyst complex component, putative                                                 |
| 488528980-488534766 | TraesCS4A01G200200 | Two-component response regulator-like protein                                       |
| 488535721-488536287 | TraesCS4A01G200300 | 5'-AMP-activated protein kinase beta-2 subunit protein                              |
| 489083272-489084464 | TraesCS4A01G200400 | Apoptosis-inducing factor                                                           |
| 489090971-489091890 | TraesCS4A01G200500 | Pentatricopeptide repeat-containing protein family                                  |
| 489096748-489109008 | TraesCS4A01G200600 | Digalactosyldiacylglycerol synthase 1, chloroplastic                                |
| 489426392-489431170 | TraesCS4A01G200700 | Transcription factor-related family protein                                         |
| 489432513-489436674 | TraesCS4A01G200800 | BEL1-like homeodomain protein 1                                                     |
| 489434254-489434619 | TraesCS4A01G200900 | cysteine-rich RLK (RECEPTOR-like protein kinase) 40                                 |

---



---

|                     |                    |                                                          |
|---------------------|--------------------|----------------------------------------------------------|
| 489882900-489889416 | TraesCS4A01G201000 | Phox-associated domain,Phox-like,Sorting nexin isoform 3 |
| 490341785-490342748 | TraesCS4A01G201100 | B3 domain-containing protein                             |
| 490356118-490360729 | TraesCS4A01G201200 | GDP-L-galactose phosphorylase 1                          |
| 490593952-490604685 | TraesCS4A01G201300 | Phosphatidylinositol 4-kinase                            |
| 490770671-490776196 | TraesCS4A01G201400 | Cysteine desulfurase                                     |
| 490776678-490776968 | TraesCS4A01G201500 | Retrotransposon protein, putative, unclassified          |
| 490919189-490920803 | TraesCS4A01G201600 | E3 ubiquitin-protein ligase                              |
| 491452647-491453923 | TraesCS4A01G201700 | Peroxidase                                               |
| 491687825-491690070 | TraesCS4A01G201800 | Receptor lectin kinase                                   |
| 491709686-491710078 | TraesCS4A01G201900 | Fusarium resistance orphan protein                       |
| 491712891-491713484 | TraesCS4A01G202000 | Expressed protein-RZ53                                   |
| 491715851-491719316 | TraesCS4A01G202100 | Alcohol dehydrogenase                                    |
| 491914988-491917720 | TraesCS4A01G202200 | Alcohol dehydrogenase                                    |
| 492030110-492032620 | TraesCS4A01G202300 | Alcohol dehydrogenase                                    |
| 492352265-492355446 | TraesCS4A01G202400 | HXXXD-type acyl-transferase family protein               |
| 492527492-492528949 | TraesCS4A01G202500 | Pentatricopeptide repeat-containing protein              |
| 492531159-492534557 | TraesCS4A01G202600 | Carboxypeptidase                                         |

---

---

|                     |                    |                                                                      |
|---------------------|--------------------|----------------------------------------------------------------------|
| 492888236-492891745 | TraesCS4A01G202700 | Transport Sec24 family protein                                       |
| 492893652-492893990 | TraesCS4A01G202800 | Polynucleotidyl transferase, ribonuclease H-like superfamily protein |
| 492938661-492943177 | TraesCS4A01G202900 | Sentrin-specific protease                                            |
| 493614079-493614654 | TraesCS4A01G203000 | Dirigent protein                                                     |
| 493982436-493983254 | TraesCS4A01G203100 | Ta11-like non-LTR retrotransposon                                    |
| 494001389-494001703 | TraesCS4A01G203200 | cytochrome P450, family 705, subfamily A, polypeptide 1              |
| 494002781-494009702 | TraesCS4A01G203300 | Pyruvate kinase                                                      |
| 494009956-494010940 | TraesCS4A01G203400 | Chaperone protein dnaJ                                               |
| 494044874-494045656 | TraesCS4A01G203500 | Tapetum determinant 1                                                |
| 494144197-494144595 | TraesCS4A01G203600 | Protein Ycf2 A                                                       |
| 494457303-494457896 | TraesCS4A01G203700 | Protein tapetum determinant 1                                        |
| 494552792-494558815 | TraesCS4A01G203800 | ABC1-like kinase                                                     |
| 494640795-494643747 | TraesCS4A01G203900 | DAG protein, chloroplastic                                           |
| 495078320-495087074 | TraesCS4A01G204000 | Methylthioribose-1-phosphate isomerase                               |
| 495101081-495124433 | TraesCS4A01G204100 | mRNA-capping enzyme                                                  |
| 495106845-495107264 | TraesCS4A01G204200 | hAT transposon superfamily                                           |
| 495796296-495799843 | TraesCS4A01G204300 | Basic-leucine zipper (bZIP) transcription factor family protein      |

---

---

|                     |                    |                                                             |
|---------------------|--------------------|-------------------------------------------------------------|
| 495801483-495803606 | TraesCS4A01G204400 | DNA-directed RNA polymerase                                 |
| 496062509-496074870 | TraesCS4A01G204500 | ATP-dependent protease La (LON) domain-containing protein   |
| 496113929-496115045 | TraesCS4A01G204600 | Interferon-induced protein 44                               |
| 496997901-497003812 | TraesCS4A01G204700 | ATP-dependent zinc metalloprotease FtsH                     |
| 497010610-497013169 | TraesCS4A01G204800 | Ribosomal protein                                           |
| 497024216-497029204 | TraesCS4A01G204900 | Auxin-responsive protein                                    |
| 497075203-497076970 | TraesCS4A01G205000 | Auxin-responsive protein                                    |
| 497439926-497442580 | TraesCS4A01G205100 | Kinase family protein                                       |
| 497494359-497496234 | TraesCS4A01G205200 | Serpin family protein                                       |
| 497810191-497812673 | TraesCS4A01G205300 | RNA apurinic site specific lyase                            |
| 497814133-497815577 | TraesCS4A01G205400 | XH/XS domain protein                                        |
| 497871084-497872221 | TraesCS4A01G205500 | ERD (early-responsive to dehydration stress) family protein |
| 497888723-497890741 | TraesCS4A01G205600 | Protein FRIGIDA                                             |
| 498212114-498213790 | TraesCS4A01G205700 | glucan synthase-like 10                                     |
| 498675787-498677685 | TraesCS4A01G205800 | Receptor-like kinase                                        |
| 498693152-498701803 | TraesCS4A01G205900 | Shortage in chiasmata                                       |
| 498985630-498988773 | TraesCS4A01G206000 | Receptor-kinase, putative                                   |

---

---

|                     |                    |                                                                                 |
|---------------------|--------------------|---------------------------------------------------------------------------------|
| 498993712-498999838 | TraesCS4A01G206100 | FHA domain containing protein, expressed                                        |
| 499341534-499344935 | TraesCS4A01G206200 | protein kinase family protein                                                   |
| 499351019-499352479 | TraesCS4A01G206300 | Integrator complex subunit 3-like protein                                       |
| 499354369-499356918 | TraesCS4A01G206400 | Fructose-bisphosphate aldolase                                                  |
| 499953247-499954317 | TraesCS4A01G206500 | AGC (cAMP-dependent, cGMP-dependent and protein kinase C) kinase family protein |
| 500113292-500118392 | TraesCS4A01G206600 | CBS domain-containing protein, putative, expressed                              |
| 500139035-500144802 | TraesCS4A01G206700 | Filament-like plant protein                                                     |
| 500146447-500151023 | TraesCS4A01G206800 | Glutamyl-tRNA(Gln) amidotransferase subunit A                                   |
| 500349681-500351705 | TraesCS4A01G206900 | V-type proton ATPase proteolipid subunit                                        |
| 500352424-500357005 | TraesCS4A01G207000 | Long-Chain Acyl-CoA Synthetase                                                  |
| 500412502-500422120 | TraesCS4A01G207100 | Protein FAR1-RELATED SEQUENCE 5                                                 |
| 500431374-500433104 | TraesCS4A01G207200 | Glyoxal oxidase                                                                 |
| 500629797-500631119 | TraesCS4A01G207300 | Hyccin                                                                          |
| 500635505-500637009 | TraesCS4A01G207400 | transmembrane protein, putative (DUF247)                                        |
| 500658557-500660041 | TraesCS4A01G207500 | C2H2-like zinc finger protein                                                   |
| 500900825-500902375 | TraesCS4A01G207600 | Auxin influx transporter                                                        |

---

---

|                     |                    |                                              |
|---------------------|--------------------|----------------------------------------------|
| 500905280-500912000 | TraesCS4A01G207700 | Sec1 family domain-containing protein 2      |
| 501123018-501125005 | TraesCS4A01G207800 | Receptor-like kinase                         |
| 501125644-501129860 | TraesCS4A01G207900 | Alba DNA/RNA-binding protein                 |
| 501132294-501134463 | TraesCS4A01G208000 | Ribosomal protein L3                         |
| 501138148-501140321 | TraesCS4A01G208100 | Syntaxin protein                             |
| 501243616-501244080 | TraesCS4A01G208200 | Egg cell-secreted protein 1.1                |
| 501260011-501260936 | TraesCS4A01G208300 | Ta11-like non-LTR retrotransposon            |
| 501468566-501469147 | TraesCS4A01G208400 | Abscisic stress-ripening protein             |
| 501638027-501640621 | TraesCS4A01G208500 | Exocyst complex component, putative          |
| 501959071-501961411 | TraesCS4A01G208600 | heat shock protein                           |
| 501961857-501966950 | TraesCS4A01G208700 | Meiosis arrest female protein 1              |
| 501967261-501972388 | TraesCS4A01G208800 | Protein FAM135B                              |
| 501975190-501976419 | TraesCS4A01G208900 | Plant/F1M20-13 protein                       |
| 502027925-502030925 | TraesCS4A01G209000 | Tubby-like F-box protein                     |
| 502356611-502357930 | TraesCS4A01G209100 | Transcription factor, putative               |
| 502362586-502364491 | TraesCS4A01G209200 | Transposon protein, putative, Pong sub-class |
| 502900389-502901207 | TraesCS4A01G209300 | MAU2 chromatid cohesion factor homolog       |

---

---

|                     |                    |                                                          |
|---------------------|--------------------|----------------------------------------------------------|
| 502901041-502905693 | TraesCS4A01G209400 | Cytochrome b-c1 complex subunit 6                        |
| 503212518-503219328 | TraesCS4A01G209500 | Autophagy-related protein 13                             |
| 503235890-503236489 | TraesCS4A01G209600 | Vacuolar iron transporter-like protein                   |
| 503611371-503612855 | TraesCS4A01G209700 | NBS-LRR-like resistance protein                          |
| 503616427-503617851 | TraesCS4A01G209800 | GRAS family transcription factor containing protein      |
| 503629170-503632543 | TraesCS4A01G209900 | Transcription factor                                     |
| 503683127-503683996 | TraesCS4A01G210000 | Major cell-surface adhesin PAc                           |
| 504172557-504173584 | TraesCS4A01G210100 | Heavy metal transport/detoxification superfamily protein |
| 504183854-504198776 | TraesCS4A01G210200 | RING/FYVE/PHD zinc finger protein, putative              |
| 504199319-504200044 | TraesCS4A01G210300 | histone acetyltransferase of the CBP family 12           |
| 504201715-504202428 | TraesCS4A01G210400 | DUF241 domain protein, putative (DUF241)                 |
| 504204317-504205117 | TraesCS4A01G210500 | DUF241 domain protein, putative (DUF241)                 |
| 504207555-504208259 | TraesCS4A01G210600 | DUF241 domain protein, putative (DUF241)                 |
| 504210903-504211694 | TraesCS4A01G210700 | DUF241 domain protein, putative (DUF241)                 |
| 504214309-504214932 | TraesCS4A01G210800 | DUF241 domain protein (DUF241)                           |
| 504216896-504217294 | TraesCS4A01G210900 | DUF241 domain protein, putative (DUF241)                 |
| 504675538-504676842 | TraesCS4A01G211000 | ORMDL family protein-like                                |

---

---

|                     |                    |                                                                          |
|---------------------|--------------------|--------------------------------------------------------------------------|
| 504789781-504792520 | TraesCS4A01G211100 | MYB transcription factor                                                 |
| 504860925-504875568 | TraesCS4A01G211200 | Polyamine oxidase-like protein                                           |
| 504875850-504876248 | TraesCS4A01G211300 | Small conductance calcium-activated potassium channel protein 2          |
| 505495653-505496209 | TraesCS4A01G211400 | Heavy-metal-associated domain-containing protein, putative, expressed    |
| 505789086-505790276 | TraesCS4A01G211500 | exosome complex exonuclease                                              |
| 505790616-505794673 | TraesCS4A01G211600 | Kinase                                                                   |
| 506164630-506171334 | TraesCS4A01G211700 | Transcriptional corepressor SEUSS                                        |
| 506709256-506720722 | TraesCS4A01G211800 | Transcriptional corepressor SEUSS                                        |
| 507107850-507108270 | TraesCS4A01G211900 | GTPase Der                                                               |
| 507561295-507561837 | TraesCS4A01G212000 | Coiled-coil domain-containing protein 18, putative isoform 1             |
| 507592560-507594188 | TraesCS4A01G212100 | FAD-binding Berberine family protein, putative                           |
| 507908870-507910036 | TraesCS4A01G212200 | External alternative NAD(P)H-ubiquinone oxidoreductase B2, mitochondrial |
| 507959947-507962049 | TraesCS4A01G212300 | F-box family protein                                                     |
| 507964089-507975633 | TraesCS4A01G212400 | Cysteine synthase                                                        |
| 508273954-508274503 | TraesCS4A01G212500 | Acetyltransferase, GNAT family protein, expressed                        |
| 508494103-508494603 | TraesCS4A01G212600 | Acetyltransferase (GNAT) domain protein                                  |
| 510638985-510639524 | TraesCS4A01G212700 | N-acetyllactosaminide alpha-2,3-sialyltransferase (Sialyltransferase 6)  |

---

---

|                     |                    |                                                                                                                     |
|---------------------|--------------------|---------------------------------------------------------------------------------------------------------------------|
| 511022104-511024508 | TraesCS4A01G212800 | UDP-N-acetylglucosamine--N-acetylmuramyl-(pentapeptide) pyrophosphoryl-undecaprenol N-acetylglucosamine transferase |
| 511036932-511038507 | TraesCS4A01G212900 | Pentatricopeptide repeat-containing protein, putative                                                               |
| 511079422-511083784 | TraesCS4A01G213000 | F-box family protein                                                                                                |
| 511132296-511133523 | TraesCS4A01G213100 | NAC domain protein                                                                                                  |
| 511187957-511189477 | TraesCS4A01G213200 | Histone deacetylase                                                                                                 |
| 511227620-511229247 | TraesCS4A01G213300 | Monoxygenase, FAD-binding protein                                                                                   |
| 511230595-511232468 | TraesCS4A01G213400 | Nucleoside diphosphate kinase                                                                                       |
| 511702496-511703827 | TraesCS4A01G213500 | Aspartic proteinase nepenthesin-1                                                                                   |
| 511753946-511754482 | TraesCS4A01G213600 | Eukaryotic translation initiation factor 3 subunit A                                                                |
| 511824039-511826026 | TraesCS4A01G213700 | Dynamin family protein, putative, expressed                                                                         |
| 512012996-512023533 | TraesCS4A01G213800 | Uridine kinase                                                                                                      |
| 512020435-512021019 | TraesCS4A01G213900 | aluminum-activated malate transporter 1                                                                             |
| 512024465-512028065 | TraesCS4A01G214000 | myosin XI D                                                                                                         |
| 512343253-512349340 | TraesCS4A01G214100 | TOM1-like protein 2                                                                                                 |
| 512354009-512357372 | TraesCS4A01G214200 | Protein disulfide-isomerase                                                                                         |
| 512538021-512539064 | TraesCS4A01G214300 | Protein BPS1, chloroplastic                                                                                         |

---



---

|                     |                    |                                                                     |
|---------------------|--------------------|---------------------------------------------------------------------|
| 512539933-512545282 | TraesCS4A01G214400 | transmembrane protein (DUF616)                                      |
| 512579358-512581370 | TraesCS4A01G214500 | DnaJ domain containing protein, expressed                           |
| 512835458-512836424 | TraesCS4A01G214600 | Glycosyl hydrolase superfamily protein                              |
| 513082798-513087480 | TraesCS4A01G214700 | B3 domain-containing protein                                        |
| 513089416-513089859 | TraesCS4A01G214800 | Ribonuclease E inhibitor RraA/Dimethylmenaquinone methyltransferase |
| 513120167-513121106 | TraesCS4A01G214900 | Retrotransposon protein, putative, unclassified                     |
| 513288348-513292999 | TraesCS4A01G215000 | magnesium transporter NIPA (DUF803)                                 |
| 513341536-513342366 | TraesCS4A01G215100 | WEB family protein                                                  |
| 513349444-513349725 | TraesCS4A01G215200 | ABC-2 and Plant PDR ABC-type transporter family protein             |
| 513804403-513805973 | TraesCS4A01G215300 | Amino acid permease                                                 |
| 513922366-513922801 | TraesCS4A01G215400 | Neurogenic differentiation factor 1                                 |
| 513999399-514003377 | TraesCS4A01G215500 | Rubredoxin                                                          |
| 514078413-514081489 | TraesCS4A01G215600 | 50S ribosomal protein L19, putative                                 |
| 514341519-514344118 | TraesCS4A01G215700 | F-box family protein                                                |
| 514353267-514354960 | TraesCS4A01G215800 | F-box family protein                                                |
| 514406360-514406623 | TraesCS4A01G215900 | Pyridoxine/pyridoxamine 5'-phosphate oxidase                        |
| 514412272-514421374 | TraesCS4A01G216000 | Cytochrome P450                                                     |

---

---

|                     |     |                    |                                                                    |
|---------------------|-----|--------------------|--------------------------------------------------------------------|
| 514429586-514433273 |     | TraesCS4A01G216100 | Phytoalexin-deficient 4-1 protein                                  |
| 514556905-514569017 |     | TraesCS4A01G216200 | Protein translocase subunit SecA                                   |
| 515000857-515007042 |     | TraesCS4A01G216300 | ATP-dependent RNA helicase family protein                          |
| 515456321-515457192 |     | TraesCS4A01G216400 | Holliday junction ATP-dependent DNA helicase RuvA                  |
| 515461630-515466775 |     | TraesCS4A01G216500 | O-fucosyltransferase family protein                                |
| 515558080-515558421 |     | TraesCS4A01G216600 | phospholipase-like protein (PEARLI 4) family protein               |
| 515646346-515649454 |     | TraesCS4A01G216700 | Cyclic nucleotide-gated channel                                    |
| 515749585-515750250 |     | TraesCS4A01G216800 | Late embryogenesis abundant (LEA) hydroxyproline-rich glycoprotein |
| 515779130-515782750 | C16 | TraesCS4A01G216900 | ABC transporter G family member                                    |
| 516343042-516343722 | C17 | TraesCS4A01G217000 | Late embryogenesis abundant (LEA) hydroxyproline-rich glycoprotein |
| 516354856-516355404 |     | TraesCS4A01G217100 | Dirigent protein                                                   |
| 516369536-516370081 |     | TraesCS4A01G217200 | Dirigent protein                                                   |
| 516583296-516583874 |     | TraesCS4A01G217300 | Dirigent protein                                                   |
| 516587843-516608751 |     | TraesCS4A01G217400 | Dirigent protein                                                   |
| 516890842-516894346 |     | TraesCS4A01G217500 | DUF668 family protein                                              |
| 516931760-516937462 |     | TraesCS4A01G217600 | Receptor-type tyrosine-protein phosphatase                         |
| 517400440-517410772 |     | TraesCS4A01G217700 | ATP-dependent RNA helicase RhlB                                    |

---

---

|                     |                    |                                                                          |
|---------------------|--------------------|--------------------------------------------------------------------------|
| 517884383-517885453 | TraesCS4A01G217800 | MYB transcription factor                                                 |
| 518822694-518829375 | TraesCS4A01G217900 | Transmembrane 9 superfamily member                                       |
| 518970702-518985627 | TraesCS4A01G218000 | Protein ZINC INDUCED FACILITATOR-LIKE 1                                  |
| 519570632-519574956 | TraesCS4A01G218100 | MLO-like protein                                                         |
| 519630531-519633743 | TraesCS4A01G218200 | Fe/S biogenesis protein nfuA                                             |
| 519675892-519678306 | TraesCS4A01G218300 | Short-chain dehydrogenase/reductase family protein                       |
| 520125235-520127884 | TraesCS4A01G218400 | Methylsterol monooxygenase 1-2                                           |
| 520954343-520955011 | TraesCS4A01G218500 | arginine N-methyltransferase, putative (DUF688)                          |
| 521069473-521078564 | TraesCS4A01G218600 | WD40 repeat-like protein                                                 |
| 521263892-521272090 | TraesCS4A01G218700 | SWI/SNF complex subunit SWI3C                                            |
| 521300093-521300491 | TraesCS4A01G218800 | RNA-directed DNA polymerase; Ribonuclease H, related                     |
| 521538536-521551738 | TraesCS4A01G218900 | U-box domain-containing protein                                          |
| 521556213-521557786 | TraesCS4A01G219000 | Replication protein A subunit                                            |
| 521557979-521562568 | TraesCS4A01G219100 | E3 ubiquitin-protein ligase SINA-like 10                                 |
| 521588243-521589369 | TraesCS4A01G219200 | Purine nucleoside phosphorylase DeoD-type                                |
| 521602640-521603779 | TraesCS4A01G219300 | P-loop containing nucleoside triphosphate hydrolases superfamily protein |
| 521624277-521625872 | TraesCS4A01G219400 | Heavy metal-associated protein                                           |

---

---

|                     |                    |                                                                                    |
|---------------------|--------------------|------------------------------------------------------------------------------------|
| 521812354-521815231 | TraesCS4A01G219500 | Aspartic proteinase Asp1                                                           |
| 521846077-521847275 | TraesCS4A01G219600 | Eukaryotic aspartyl protease family protein, expressed                             |
| 521918428-521919907 | TraesCS4A01G219700 | NAC domain-containing protein, putative                                            |
| 521945567-521946917 | TraesCS4A01G219800 | Major Facilitator Superfamily with SPX (SYG1/Pho81/XPR1) domain-containing protein |
| 522153951-522157524 | TraesCS4A01G219900 | Aldehyde dehydrogenase                                                             |
| 522293017-522295793 | TraesCS4A01G220000 | S-adenosyl-L-methionine-dependent methyltransferases superfamily protein           |
| 522907855-522921868 | TraesCS4A01G220100 | DNA polymerase                                                                     |
| 522972703-522973478 | TraesCS4A01G220200 | Pre-mRNA splicing factor, putative                                                 |
| 523447064-523455580 | TraesCS4A01G220300 | Kinase family protein                                                              |
| 523456273-523458075 | TraesCS4A01G220400 | Proteasome subunit beta type                                                       |
| 524178707-524179452 | TraesCS4A01G220500 | Pre-mRNA splicing factor, putative                                                 |
| 524272281-524273502 | TraesCS4A01G220600 | DNA ligase                                                                         |
| 524280168-524287073 | TraesCS4A01G220700 | Chromatin modification-related protein EAF1 A                                      |
| 525043352-525044383 | TraesCS4A01G220800 | Transposase                                                                        |
| 525110484-525111035 | TraesCS4A01G220900 | RING/U-box superfamily protein                                                     |
| 525152818-525153189 | TraesCS4A01G221000 | Cartilage oligomeric matrix protein                                                |

---

---

|                     |                    |                                                       |
|---------------------|--------------------|-------------------------------------------------------|
| 525736772-525737806 | TraesCS4A01G221100 | GATA transcription factor                             |
| 526640028-526642987 | TraesCS4A01G221200 | WD-repeat protein, putative                           |
| 527001528-527002834 | TraesCS4A01G221300 | 1-aminocyclopropane-1-carboxylate oxidase             |
| 527009136-527014811 | TraesCS4A01G221400 | NAD kinase                                            |
| 527112680-527113582 | TraesCS4A01G221500 | Sphingoid base hydroxylase 2                          |
| 527120170-527132709 | TraesCS4A01G221600 | DNA ligase 1                                          |
| 527495980-527500050 | TraesCS4A01G221700 | Protein kinase family protein, putative, expressed    |
| 527575814-527576790 | TraesCS4A01G221800 | Myb/SANT-like DNA-binding domain protein              |
| 527902974-527913262 | TraesCS4A01G221900 | Transducin/WD-like repeat-protein                     |
| 528604540-528605440 | TraesCS4A01G222000 | F-box family protein                                  |
| 528644556-528645197 | TraesCS4A01G222100 | F-box domain containing protein                       |
| 529619251-529626266 | TraesCS4A01G222200 | Protein TPLATE                                        |
| 529625774-529626034 | TraesCS4A01G222300 | Homoserine/homoserine lactone efflux protein          |
| 529626929-529628377 | TraesCS4A01G222400 | Pentatricopeptide repeat-containing protein, putative |
| 529629746-529631972 | TraesCS4A01G222500 | B3 domain-containing protein                          |
| 529633638-529634432 | TraesCS4A01G222600 | Serpin family protein                                 |
| 530121870-530123027 | TraesCS4A01G222700 | Transcription factor, putative                        |

---

---

|                     |                    |                                                                   |
|---------------------|--------------------|-------------------------------------------------------------------|
| 530172977-530179549 | TraesCS4A01G222800 | RING-finger E3 ubiquitin ligase, putative                         |
| 530815792-530819262 | TraesCS4A01G222900 | Neutral/alkaline invertase                                        |
| 530891468-530892193 | TraesCS4A01G223000 | Beta-1,3-N-Acetylglucosaminyltransferase family protein, putative |
| 530935273-530935944 | TraesCS4A01G223100 | Harpin inducing protein                                           |
| 530936889-530938446 | TraesCS4A01G223200 | receptor kinase 1                                                 |
| 531073743-531077003 | TraesCS4A01G223300 | NBS-LRR disease resistance protein-like                           |
| 531077535-531097706 | TraesCS4A01G223400 | protein kinase family protein                                     |
| 531236819-531241694 | TraesCS4A01G223500 | Disease resistance protein RPM1                                   |
| 531247082-531249319 | TraesCS4A01G223600 | receptor kinase 1                                                 |
| 531304423-531309137 | TraesCS4A01G223700 | Photosystem II reaction center PsbP family protein                |
| 531311802-531313877 | TraesCS4A01G223800 | Receptor-like protein kinase                                      |
| 531325926-531326657 | TraesCS4A01G223900 | receptor kinase 1                                                 |
| 531383913-531386654 | TraesCS4A01G224000 | NBS-LRR disease resistance protein, putative, expressed           |
| 531677814-531680552 | TraesCS4A01G224100 | NBS-LRR disease resistance protein, putative, expressed           |
| 531952996-531955530 | TraesCS4A01G224200 | Transposon protein, putative, CACTA, En/Spm sub-class             |
| 532073805-532075311 | TraesCS4A01G224300 | Rpr4901.2                                                         |
| 532208397-532209491 | TraesCS4A01G224400 | receptor kinase 1                                                 |

---

---

|                     |                    |                                                         |
|---------------------|--------------------|---------------------------------------------------------|
| 532216853-532217890 | TraesCS4A01G224500 | NBS-LRR disease resistance protein, putative, expressed |
| 532223673-532224099 | TraesCS4A01G224600 | Pentatricopeptide repeat (PPR) superfamily protein      |
| 532350376-532353361 | TraesCS4A01G224700 | Receptor protein kinase, putative                       |
| 532791942-532797429 | TraesCS4A01G224800 | Non-specific serine/threonine protein kinase            |
| 532833164-532834197 | TraesCS4A01G224900 | Gibberellin receptor GID1a                              |
| 532897177-532898552 | TraesCS4A01G225000 | Gibberellin receptor GID1A                              |
| 533000510-533006669 | TraesCS4A01G225100 | Sucrose-phosphate synthase                              |
| 533010789-533015786 | TraesCS4A01G225200 | Glycerophosphodiester phosphodiesterase                 |
| 533032338-533032802 | TraesCS4A01G225300 | VQ motif-containing protein                             |
| 533258157-533262230 | TraesCS4A01G225400 | Protein NRT1/ PTR FAMILY 1.2                            |
| 533444658-533448029 | TraesCS4A01G225500 | PHD finger protein                                      |
| 533459478-533463467 | TraesCS4A01G225600 | B3 domain-containing protein                            |
| 533843378-533844403 | TraesCS4A01G225700 | Gibberellin receptor GID1a                              |
| 534042906-534057343 | TraesCS4A01G225800 | CCR4-NOT transcription complex subunit 11               |
| 534160530-534161546 | TraesCS4A01G225900 | BPS1-like protein (DUF793)                              |
| 534167672-534170275 | TraesCS4A01G226000 | ATP-dependent Clp protease ATP-binding subunit          |
| 534229856-534237751 | TraesCS4A01G226100 | Serine carboxypeptidase family protein, expressed       |

---

---

|                     |                    |                                                                               |
|---------------------|--------------------|-------------------------------------------------------------------------------|
| 534258202-534258657 | TraesCS4A01G226200 | DUF538 family protein, putative (Protein of unknown function, DUF538)         |
| 534523568-534526756 | TraesCS4A01G226300 | Protein phosphatase 2c, putative                                              |
| 534545306-534554553 | TraesCS4A01G226400 | Non-lysosomal glucosylceramidase                                              |
| 534780326-534790750 | TraesCS4A01G226500 | DNA polymerase III subunit                                                    |
| 534790776-534791913 | TraesCS4A01G226600 | lysine ketoglutarate reductase trans-splicing-like protein, putative (DUF707) |
| 534811309-534812238 | TraesCS4A01G226700 | Heat-shock protein, putative                                                  |
| 535034849-535036054 | TraesCS4A01G226800 | Zinc finger-homeodomain protein 1                                             |
| 535242506-535243985 | TraesCS4A01G226900 | Chlorophyll a-b binding protein, chloroplastic                                |
| 535244690-535248317 | TraesCS4A01G227000 | Glycine-rich protein                                                          |
| 535425668-535426642 | TraesCS4A01G227100 | Glucuronoxylan 4-O-methyltransferase                                          |
| 535427916-535431632 | TraesCS4A01G227200 | Protein kinase-like protein                                                   |
| 535464263-535466861 | TraesCS4A01G227300 | Chlorophyll a/b binding protein domain-containing protein                     |
| 535819032-535819589 | TraesCS4A01G227400 | ethylene-responsive transcription factor                                      |
| 535845399-535855523 | TraesCS4A01G227500 | DNA-(apurinic or apyrimidinic site) lyase                                     |
| 535856321-535874270 | TraesCS4A01G227600 | ABC transporter, putative                                                     |
| 535871696-535873014 | TraesCS4A01G227700 | Retrovirus-related Pol polyprotein from transposon TNT 1-94                   |
| 536197440-536198627 | TraesCS4A01G227800 | ENTH/ANTH/VHS superfamily protein                                             |

---



---

|                     |                    |                                                               |
|---------------------|--------------------|---------------------------------------------------------------|
| 536202329-536211191 | TraesCS4A01G227900 | PHD finger alfin-like protein                                 |
| 536327998-536328854 | TraesCS4A01G228000 | related to vernalization1 1                                   |
| 536770702-536772767 | TraesCS4A01G228100 | PCTP-like protein                                             |
| 536784520-536785344 | TraesCS4A01G228200 | Zinc finger MYM-type-like protein                             |
| 536792875-536795577 | TraesCS4A01G228300 | Heparan-alpha-glucosaminide N-acetyltransferase               |
| 536820396-536820825 | TraesCS4A01G228400 | UPSTREAM OF FLC-like protein (DUF966)                         |
| 536826088-536829987 | TraesCS4A01G228500 | E3 ubiquitin-protein ligase SINA-like 10                      |
| 537182717-537184053 | TraesCS4A01G228600 | F-box/kelch-repeat protein                                    |
| 537231330-537232890 | TraesCS4A01G228700 | Transposon protein, putative, Mutator sub-class               |
| 537272548-537274101 | TraesCS4A01G228800 | F-box/kelch-repeat protein                                    |
| 537433962-537440469 | TraesCS4A01G228900 | Serine protease                                               |
| 537530140-537533999 | TraesCS4A01G229000 | Ankyrin repeat protein SKIP35                                 |
| 537543678-537544010 | TraesCS4A01G229100 | Argos-like protein                                            |
| 537592342-537596508 | TraesCS4A01G229200 | Hemolysin A family protein, expressed                         |
| 537598043-537599866 | TraesCS4A01G229300 | At2g43990/F6E13.12                                            |
| 537949589-537957582 | TraesCS4A01G229400 | La                                                            |
| 538212252-538215714 | TraesCS4A01G229500 | Retrovirus-related Pol polyprotein from transposon 297 family |

---

---

|                     |                    |                                                              |
|---------------------|--------------------|--------------------------------------------------------------|
| 538839324-538840786 | TraesCS4A01G229600 | Pectin lyase-like superfamily protein                        |
| 538905249-538906763 | TraesCS4A01G229700 | Polygalacturonase                                            |
| 539126535-539129949 | TraesCS4A01G229800 | Receptor-like kinase                                         |
| 539147640-539153101 | TraesCS4A01G229900 | NADP-dependent alkenal double bond reductase                 |
| 539156556-539160442 | TraesCS4A01G230000 | Acetolactate synthase small subunit                          |
| 539288267-539295938 | TraesCS4A01G230100 | Protein transport protein SEC23                              |
| 539297585-539299560 | TraesCS4A01G230200 | Pentatricopeptide repeat-containing protein                  |
| 539299786-539302328 | TraesCS4A01G230300 | RNA polymerase sigma factor RpoD                             |
| 539428704-539429399 | TraesCS4A01G230400 | Subtilisin-like protease                                     |
| 539583987-539585231 | TraesCS4A01G230500 | Calcineurin-like metallo-phosphoesterase superfamily protein |
| 539751161-539754738 | TraesCS4A01G230600 | F-box/LRR protein                                            |
| 539755046-539761346 | TraesCS4A01G230700 | Plant regulator RWP-RK family protein                        |
| 540014447-540017248 | TraesCS4A01G230800 | Transmembrane protein, putative                              |
| 540058987-540060777 | TraesCS4A01G230900 | Glycosyltransferase family 92 protein                        |
| 540416072-540417322 | TraesCS4A01G231000 | Glycosyltransferase family 92 protein                        |
| 540433150-540437968 | TraesCS4A01G231100 | ER membrane protein complex subunit 10                       |
| 540441364-540444518 | TraesCS4A01G231200 | COBRA-like protein                                           |

---

---

|                     |                    |                                                          |
|---------------------|--------------------|----------------------------------------------------------|
| 540600328-540604473 | TraesCS4A01G231300 | Homeobox-leucine zipper protein                          |
| 540957727-540959091 | TraesCS4A01G231400 | Aspartic proteinase nepenthesin-1                        |
| 541172421-541172911 | TraesCS4A01G231500 | cleavage and polyadenylation specificity factor 160      |
| 541337582-541340608 | TraesCS4A01G231600 | BSD domain containing protein, expressed                 |
| 541357800-541358522 | TraesCS4A01G231700 | Protein MIZU-KUSSEI 1                                    |
| 541361828-541366225 | TraesCS4A01G231800 | Protein ApaG                                             |
| 541426996-541430264 | TraesCS4A01G231900 | DUF936 family protein                                    |
| 541672086-541679832 | TraesCS4A01G232000 | Dehydrogenase/reductase SDR family member                |
| 541680317-541686269 | TraesCS4A01G232100 | RNA-binding ASCH domain protein                          |
| 541784613-541786988 | TraesCS4A01G232200 | Receptor-kinase, putative                                |
| 541890982-541892848 | TraesCS4A01G232300 | NAD(P)H dehydrogenase subunit 48                         |
| 541987324-541988376 | TraesCS4A01G232400 | Tetrapyrrole-binding protein, chloroplastic              |
| 541988817-541994144 | TraesCS4A01G232500 | UPF0454 protein C12orf49                                 |
| 542020316-542024151 | TraesCS4A01G232600 | Eukaryotic translation initiation factor 3 subunit B     |
| 542026261-542033155 | TraesCS4A01G232700 | Endonuclease III homolog                                 |
| 542033451-542038903 | TraesCS4A01G232800 | Chloroplast ATP-dependent Clp protease chaperone protein |
| 542039991-542040407 | TraesCS4A01G232900 | ATP-dependent Clp protease, ATP-binding subunit          |

---

---

|                     |                    |                                                                         |
|---------------------|--------------------|-------------------------------------------------------------------------|
| 542045910-542047863 | TraesCS4A01G233000 | F-box protein-like protein                                              |
| 542248874-542250602 | TraesCS4A01G233100 | Kinesin-1 heavy chain                                                   |
| 542261581-542263453 | TraesCS4A01G233200 | Pre-mRNA-processing protein 40A                                         |
| 542264619-542266973 | TraesCS4A01G233300 | 40S ribosomal protein S27                                               |
| 542269885-542280729 | TraesCS4A01G233400 | Exocyst complex component SEC3A                                         |
| 542476351-542481624 | TraesCS4A01G233500 | ATP-dependent (S)-NAD(P)H-hydrate dehydratase                           |
| 542499165-542500039 | TraesCS4A01G233600 | DUF1685 family protein                                                  |
| 542532836-542533493 | TraesCS4A01G233700 | B3 domain-containing protein                                            |
| 542553417-542555908 | TraesCS4A01G233800 | B3 domain-containing protein                                            |
| 542617981-542621127 | TraesCS4A01G233900 | B3 domain-containing protein                                            |
| 542827942-542829242 | TraesCS4A01G234000 | Dof zinc finger protein                                                 |
| 543332002-543333307 | TraesCS4A01G234100 | 2-oxoglutarate (2OG) and Fe(II)-dependent oxygenase superfamily protein |
| 543340553-543341184 | TraesCS4A01G234200 | Glutamine dumper, putative                                              |
| 543347199-543348170 | TraesCS4A01G234300 | Mitochondrial transcription termination factor family protein           |
| 543365697-543369614 | TraesCS4A01G234400 | N-acetyl-gamma-glutamyl-phosphate reductase                             |
| 543374607-543375910 | TraesCS4A01G234500 | basic helix-loop-helix (bHLH) DNA-binding superfamily protein           |
| 543608520-543610470 | TraesCS4A01G234600 | Cyclin family protein                                                   |

---

---

|                     |                    |                                                               |
|---------------------|--------------------|---------------------------------------------------------------|
| 543735662-543740221 | TraesCS4A01G234700 | Calcium-transporting ATPase                                   |
| 543740661-543746036 | TraesCS4A01G234800 | DNA polymerase IV                                             |
| 544031261-544032679 | TraesCS4A01G234900 | F-box family protein                                          |
| 544033032-544036361 | TraesCS4A01G235000 | 50S ribosomal protein L25                                     |
| 544046934-544047800 | TraesCS4A01G235100 | LOB domain family protein                                     |
| 544055775-544058074 | TraesCS4A01G235200 | Protein OSB1, mitochondrial                                   |
| 544058447-544060908 | TraesCS4A01G235300 | Oxidoreductase, aldo/keto reductase family protein, expressed |
| 544062199-544067990 | TraesCS4A01G235400 | Surface presentation of antigens protein SpaR                 |
| 544174235-544177981 | TraesCS4A01G235500 | Oxidoreductase, aldo/keto reductase family protein, expressed |
| 544197932-544201050 | TraesCS4A01G235600 | Kinase family protein                                         |
| 544201959-544204242 | TraesCS4A01G235700 | Serpin family protein                                         |
| 544380953-544382209 | TraesCS4A01G235800 | Peroxidase                                                    |
| 544389388-544390826 | TraesCS4A01G235900 | Serpin family protein                                         |
| 544397231-544397845 | TraesCS4A01G236000 | Zinc finger protein, putative                                 |
| 544887198-544891670 | TraesCS4A01G236100 | BTB/POZ domain-containing protein                             |
| 544953084-544954778 | TraesCS4A01G236200 | LOB domain-containing protein, putative                       |
| 545105716-545106960 | TraesCS4A01G236300 | Ethylene-responsive transcription factor                      |

---

---

|                     |                    |                                                                                              |
|---------------------|--------------------|----------------------------------------------------------------------------------------------|
| 545114629-545117369 | TraesCS4A01G236400 | Fumarylacetoacetate hydrolase, putative                                                      |
| 545124466-545124741 | TraesCS4A01G236500 | SWAP (Suppressor-of-White-APricot)/surp domain-containing protein / ubiquitin family protein |
| 545192213-545193592 | TraesCS4A01G236600 | 2-oxoglutarate (2OG) and Fe(II)-dependent oxygenase superfamily protein                      |
| 545235570-545237367 | TraesCS4A01G236700 | Cyclin                                                                                       |
| 545601815-545606948 | TraesCS4A01G236800 | MAR-binding filament-like protein                                                            |
| 545761956-545762903 | TraesCS4A01G236900 | CCR4-NOT transcription complex subunit 7                                                     |
| 545770348-545777493 | TraesCS4A01G237000 | Methionine S-methyltransferase                                                               |
| 546005400-546005792 | TraesCS4A01G237100 | RNA-directed DNA polymerase; Ribonuclease H, related                                         |
| 546017711-546020208 | TraesCS4A01G237200 | Metal transporter                                                                            |
| 546210168-546212042 | TraesCS4A01G237300 | glutamyl-tRNA (Gln) amidotransferase subunit A (DUF620)                                      |
| 546256267-546259001 | TraesCS4A01G237400 | RING/U-box superfamily protein                                                               |
| 546296550-546298853 | TraesCS4A01G237500 | Subtilisin-like protease                                                                     |
| 546477269-546483413 | TraesCS4A01G237600 | Ribosomal RNA small subunit methyltransferase H                                              |
| 546484423-546487035 | TraesCS4A01G237700 | A-kinase anchor protein 9, putative isoform 1                                                |
| 546795496-546797396 | TraesCS4A01G237800 | Transcriptional adapter 1                                                                    |
| 547044672-547047206 | TraesCS4A01G237900 | UDP-glucose 6-dehydrogenase                                                                  |

---

---

|                     |                    |                                                                          |
|---------------------|--------------------|--------------------------------------------------------------------------|
| 547200426-547201448 | TraesCS4A01G238000 | Zinc finger protein, putative                                            |
| 547203176-547204576 | TraesCS4A01G238100 | Presenilin                                                               |
| 547228876-547233151 | TraesCS4A01G238200 | Pentatricopeptide repeat-containing protein                              |
| 547300820-547303249 | TraesCS4A01G238300 | Mitochondrial import receptor subunit TOM5                               |
| 547516971-547518642 | TraesCS4A01G238400 | Remorin                                                                  |
| 547928686-547930299 | TraesCS4A01G238500 | Adenine/guanine permease                                                 |
| 547978932-547980325 | TraesCS4A01G238600 | Cysteine proteinase                                                      |
| 547982698-547983024 | TraesCS4A01G238700 | Leucine-rich repeat protein kinase family protein                        |
| 548053473-548056171 | TraesCS4A01G238800 | 4-coumarate--CoA ligase like                                             |
| 548066534-548067145 | TraesCS4A01G238900 | Rho GTPase activation protein (RhoGAP) with PH domain-containing protein |
| 548274831-548282171 | TraesCS4A01G239000 | 4-coumarate--CoA ligase like                                             |
| 548341734-548344564 | TraesCS4A01G239100 | 4-coumarate-CoA ligase                                                   |
| 548515335-548515670 | TraesCS4A01G239200 | Dolichol phosphate-mannose biosynthesis regulatory protein               |
| 548518832-548527672 | TraesCS4A01G239300 | Exosome complex component                                                |
| 548523978-548525431 | TraesCS4A01G239400 | Retrovirus-related like polyprotein                                      |
| 548529652-548542423 | TraesCS4A01G239500 | ATP-dependent RNA helicase, putative                                     |
| 548774590-548779050 | TraesCS4A01G239600 | Receptor protein kinase-like protein                                     |

---

---

|                     |                    |                                                     |
|---------------------|--------------------|-----------------------------------------------------|
| 548779766-548784167 | TraesCS4A01G239700 | WD repeat protein-like                              |
| 548819782-548822077 | TraesCS4A01G239800 | T-box transcription factor, putative (DUF863)       |
| 549670861-549672254 | TraesCS4A01G239900 | O-methyltransferase                                 |
| 549799338-549800138 | TraesCS4A01G240000 | Thioredoxin                                         |
| 549803298-549807400 | TraesCS4A01G240100 | Cycloeucaenol cycloisomerase                        |
| 549816755-549820868 | TraesCS4A01G240200 | Receptor-like kinase                                |
| 549879176-549882741 | TraesCS4A01G240300 | Haloacid dehalogenase-like hydrolase family protein |
| 549922700-549924088 | TraesCS4A01G240400 | Phospholipase a1-chloroplastic-like                 |
| 550082585-550083910 | TraesCS4A01G240500 | Phospholipase a1-chloroplastic-like                 |
| 550324968-550328176 | TraesCS4A01G240600 | Mitochondrial substrate carrier family protein      |
| 550464945-550467229 | TraesCS4A01G240700 | Amino acid transporter family protein, putative     |
| 550476231-550480359 | TraesCS4A01G240800 | Thioredoxin-like protein 4B                         |
| 550481163-550487426 | TraesCS4A01G240900 | Beta-xylosidase, putative                           |
| 550488935-550489096 | TraesCS4A01G241000 | Ribosomal protein L2                                |
| 550495384-550500502 | TraesCS4A01G241100 | Histidine triad nucleotide-binding protein          |
| 550501738-550508742 | TraesCS4A01G241200 | UBX domain containing protein, expressed            |
| 551132424-551133863 | TraesCS4A01G241300 | B3 domain-containing protein                        |

---



---

|                     |                    |                                                      |
|---------------------|--------------------|------------------------------------------------------|
| 551137905-551138171 | TraesCS4A01G241400 | O-acetylserine dependent cystathionine beta-synthase |
| 551217304-551220548 | TraesCS4A01G241500 | B3 domain-containing protein                         |
| 551493368-551493711 | TraesCS4A01G241600 | Thymidylate kinase                                   |
| 551764828-551772796 | TraesCS4A01G241700 | Eukaryotic aspartyl protease family protein          |
| 552145824-552146396 | TraesCS4A01G241800 | NADH dehydrogenase subunit 9                         |
| 552147635-552152386 | TraesCS4A01G241900 | B3 domain-containing protein                         |
| 552195896-552197461 | TraesCS4A01G242000 | B3 domain-containing protein                         |
| 552214597-552214935 | TraesCS4A01G242100 | Retrotransposon protein, putative, unclassified      |
| 552221693-552227631 | TraesCS4A01G242200 | Deoxyuridine 5'-triphosphate nucleotidohydrolase     |
| 552254537-552258366 | TraesCS4A01G242300 | B3 domain-containing protein                         |
| 552407850-552409300 | TraesCS4A01G242400 | B3 domain-containing protein                         |
| 552409708-552413672 | TraesCS4A01G242500 | caspase-6 protein                                    |
| 552500448-552506097 | TraesCS4A01G242600 | Myb family transcription factor-like protein         |
| 552698535-552700166 | TraesCS4A01G242700 | NAC domain protein,                                  |
| 552816857-552818257 | TraesCS4A01G242800 | WD40-repeat protein                                  |
| 552831656-552833113 | TraesCS4A01G242900 | WD40-repeat protein                                  |
| 552877480-552877854 | TraesCS4A01G243000 | Transposon protein, putative, unclassified           |

---

---

|                     |                    |                                                                      |
|---------------------|--------------------|----------------------------------------------------------------------|
| 552893219-552905734 | TraesCS4A01G243100 | Exocyst complex component SEC3A                                      |
| 553310632-553313968 | TraesCS4A01G243200 | RING/U-box superfamily protein                                       |
| 553316322-553317573 | TraesCS4A01G243300 | Metacaspase-1                                                        |
| 553406089-553408630 | TraesCS4A01G243400 | DNA-directed RNA polymerase III subunit RPC4                         |
| 553446992-553451942 | TraesCS4A01G243500 | Acetyltransferase component of pyruvate dehydrogenase complex        |
| 553535056-553535277 | TraesCS4A01G243600 | Chaperone protein dnaK                                               |
| 554542730-554543626 | TraesCS4A01G243700 | CCR4-NOT transcription complex subunit 7                             |
| 554558280-554559514 | TraesCS4A01G243800 | CCR4-NOT transcription complex subunit 7                             |
| 554629644-554630886 | TraesCS4A01G243900 | Polynucleotidyl transferase, ribonuclease H-like superfamily protein |
| 554632753-554637781 | TraesCS4A01G244000 | WD40 repeat-like protein                                             |
| 554699174-554699974 | TraesCS4A01G244100 | Ubiquitin-conjugating enzyme E2                                      |
| 554840090-554850060 | TraesCS4A01G244200 | RING/U-box superfamily protein                                       |
| 554853298-554854887 | TraesCS4A01G244300 | UDP-glycosyltransferase                                              |
| 554920214-554920384 | TraesCS4A01G244400 | Mitochondrial import receptor subunit TOM6-like protein              |
| 554924159-554925889 | TraesCS4A01G244500 | Type I inositol-1,4,5-trisphosphate 5-phosphatase                    |
| 554926632-554929378 | TraesCS4A01G244600 | Interferon-activable protein                                         |
| 554939208-554939585 | TraesCS4A01G244700 | lectin protein kinase family protein                                 |

---

---

|                     |                    |                                                                          |
|---------------------|--------------------|--------------------------------------------------------------------------|
| 554949269-554949565 | TraesCS4A01G244800 | Tetratricopeptide repeat (TPR)-like superfamily protein                  |
| 554959780-554960157 | TraesCS4A01G244900 | lectin protein kinase family protein                                     |
| 554973466-554973886 | TraesCS4A01G245000 | K-box region and MADS-box transcription factor family protein            |
| 555440212-555441343 | TraesCS4A01G245100 | Dormancy-associated protein/auxin-repressed protein                      |
| 555510132-555514424 | TraesCS4A01G245200 | Protein DA1-related 1                                                    |
| 555515686-555523901 | TraesCS4A01G245300 | Protein DETOXIFICATION                                                   |
| 555559271-555564187 | TraesCS4A01G245400 | Protein DETOXIFICATION                                                   |
| 555746061-555750257 | TraesCS4A01G245500 | Calcineurin B-like protein                                               |
| 556009735-556010004 | TraesCS4A01G245600 | Methionine import ATP-binding protein MetN 1                             |
| 556236782-556246954 | TraesCS4A01G245700 | Cytosolic Fe-S cluster assembly factor NBP35                             |
| 556250003-556258435 | TraesCS4A01G245800 | RNA-binding KH domain-containing protein                                 |
| 556373092-556381517 | TraesCS4A01G245900 | p-loop containing nucleoside triphosphate hydrolases superfamily protein |
| 556537589-556539531 | TraesCS4A01G246000 | WRKY transcription factor                                                |
| 556752351-556756416 | TraesCS4A01G246100 | Serine hydroxymethyltransferase                                          |
| 556822844-556825902 | TraesCS4A01G246200 | WD40 repeat-containing protein                                           |
| 556826154-556829503 | TraesCS4A01G246300 | BAT2 domain-containing protein 1                                         |
| 556830580-556842543 | TraesCS4A01G246400 | Vps51 vps67 family (Components of vesicular transport) protein           |

---

---

|                     |                    |                                                                                        |
|---------------------|--------------------|----------------------------------------------------------------------------------------|
| 557245005-557247884 | TraesCS4A01G246500 | Kinase PfkB                                                                            |
| 557250646-557253918 | TraesCS4A01G246600 | Pentatricopeptide repeat-containing protein                                            |
| 557662346-557663145 | TraesCS4A01G246700 | Ubiquitin-conjugating enzyme E2                                                        |
| 557729041-557733748 | TraesCS4A01G246800 | Poly(A) polymerase                                                                     |
| 557868542-557870242 | TraesCS4A01G246900 | Peptidyl-prolyl cis-trans isomerase                                                    |
| 558210083-558213670 | TraesCS4A01G247000 | Cyclin-like protein                                                                    |
| 558214466-558217058 | TraesCS4A01G247100 | Magnesium-dependent phosphatase 1                                                      |
| 558218404-558227155 | TraesCS4A01G247200 | E3 ubiquitin-protein ligase HOS1                                                       |
| 558414331-558418509 | TraesCS4A01G247300 | CBS domain containing protein, expressed                                               |
| 558547016-558548074 | TraesCS4A01G247400 | Sorghum bicolor protein targeted either to mitochondria or chloroplast proteins T50848 |
| 558648418-558649786 | TraesCS4A01G247500 | GEM-like protein 1                                                                     |
| 558650444-558651111 | TraesCS4A01G247600 | ATP synthase delta-subunit protein                                                     |
| 558655417-558656367 | TraesCS4A01G247700 | Syntaxin, putative                                                                     |
| 558667947-558669694 | TraesCS4A01G247800 | Plasma membrane ATPase                                                                 |
| 558676008-558676367 | TraesCS4A01G247900 | Cysteine proteinase inhibitor                                                          |
| 558679245-558679673 | TraesCS4A01G248000 | Alpha amylase inhibitor protein                                                        |

---

---

|                     |                    |                                                      |
|---------------------|--------------------|------------------------------------------------------|
| 558845272-558848862 | TraesCS4A01G248100 | Methyltransferase                                    |
| 559044696-559047664 | TraesCS4A01G248200 | Endoglucanase                                        |
| 559048582-559049823 | TraesCS4A01G248300 | Pentatricopeptide repeat-containing protein          |
| 559067713-559069352 | TraesCS4A01G248400 | Glycerol-3-phosphate acyltransferase                 |
| 559162733-559167933 | TraesCS4A01G248500 | Protein ZINC INDUCED FACILITATOR-LIKE 1              |
| 559486187-559487829 | TraesCS4A01G248600 | transmembrane protein, putative (DUF247)             |
| 559494215-559496292 | TraesCS4A01G248700 | Cell wall invertase                                  |
| 559894244-559897294 | TraesCS4A01G248800 | Alba DNA/RNA-binding protein                         |
| 559945250-559946956 | TraesCS4A01G248900 | Eukaryotic translation initiation factor 3 subunit G |
| 559949681-559950979 | TraesCS4A01G249000 | B3 domain-containing protein                         |
| 560313977-560315500 | TraesCS4A01G249100 | Pentatricopeptide repeat-containing protein          |
| 560317324-560319518 | TraesCS4A01G249200 | RING finger and CHY zinc finger protein              |
| 560411162-560416428 | TraesCS4A01G249300 | Transducin/WD-like repeat-protein                    |
| 560901278-560905179 | TraesCS4A01G249400 | GATA transcription factor                            |
| 560905758-560906845 | TraesCS4A01G249500 | U-box domain-containing protein 57                   |
| 560907883-560912041 | TraesCS4A01G249600 | Mitochondrial carrier protein, expressed             |
| 560951669-560951959 | TraesCS4A01G249700 | Alkyl hydroperoxide reductase subunit C              |

---

---

|                     |                    |                                                                                                        |
|---------------------|--------------------|--------------------------------------------------------------------------------------------------------|
| 560964956-560965249 | TraesCS4A01G249800 | piezo-type mechanosensitive ion channel component                                                      |
| 560970450-560971840 | TraesCS4A01G249900 | F-box domain containing protein                                                                        |
| 560994640-560996318 | TraesCS4A01G250000 | 50S ribosomal protein L7/L12                                                                           |
| 560998060-560998512 | TraesCS4A01G250100 | Discoidin, CUB and LCCL domain-containing protein 1                                                    |
| 561071827-561072185 | TraesCS4A01G250200 | SNF2 domain-containing protein / helicase domain-containing protein / zinc finger protein-like protein |
| 561102971-561103327 | TraesCS4A01G250300 | GDP-Man:Man(3)GlcNAc(2)-PP-Dol alpha-1,2-mannosyltransferase                                           |
| 561105686-561106025 | TraesCS4A01G250400 | Protein phosphatase 2C family protein                                                                  |
| 561111934-561112400 | TraesCS4A01G250500 | Vacuolar protein sorting/targeting protein 10                                                          |
| 561368126-561370971 | TraesCS4A01G250600 | GRF1-interacting factor-like protein                                                                   |
| 562280813-562281608 | TraesCS4A01G250700 | pumilio 2                                                                                              |
| 562282443-562286220 | TraesCS4A01G250800 | Endoplasmic reticulum oxidoreductin-1                                                                  |
| 562290028-562291481 | TraesCS4A01G250900 | Dehydrin                                                                                               |
| 562403111-562407137 | TraesCS4A01G251000 | Zinc finger BED domain-containing protein DAYSLEEPER                                                   |
| 562408921-562413963 | TraesCS4A01G251100 | Pollen Ole e 1 allergen/extensin                                                                       |
| 562450576-562454617 | TraesCS4A01G251200 | Zinc finger BED domain-containing protein DAYSLEEPER                                                   |
| 562458236-562458793 | TraesCS4A01G251300 | Pathogenesis-related protein 1                                                                         |

---

---

|                     |                    |                                                             |
|---------------------|--------------------|-------------------------------------------------------------|
| 562482754-562484927 | TraesCS4A01G251400 | Kinase, putative                                            |
| 562573394-562574089 | TraesCS4A01G251500 | Protein MIZU-KUSSEI 1                                       |
| 563049929-563052786 | TraesCS4A01G251600 | 4-hydroxy-3-methylbut-2-enyl diphosphate reductase          |
| 563268803-563269742 | TraesCS4A01G251700 | Pectinesterase                                              |
| 563511457-563512448 | TraesCS4A01G251800 | Homeobox transcription factor KN2                           |
| 563677948-563679541 | TraesCS4A01G251900 | Sugar transporter family protein                            |
| 563678635-563679387 | TraesCS4A01G252000 | 1,4-alpha-glucan branching enzyme GlgB                      |
| 564148415-564157977 | TraesCS4A01G252100 | Homeobox protein bell1-like protein                         |
| 564163571-564167730 | TraesCS4A01G252200 | DNA double-strand break repair rad50 ATPase                 |
| 564639556-564640280 | TraesCS4A01G252300 | Vacuolar sorting receptor family protein                    |
| 564750385-564751806 | TraesCS4A01G252400 | ARM repeat superfamily protein                              |
| 564951290-564953002 | TraesCS4A01G252500 | Peptide-N4-(N-acetyl-beta-glucosaminyl)asparagine amidase A |
| 564954817-564956321 | TraesCS4A01G252600 | Glycosyltransferase                                         |
| 564971277-564974497 | TraesCS4A01G252700 | Cathepsin B-like cysteine protease                          |
| 565040539-565043592 | TraesCS4A01G252800 | Cathepsin B-like cysteine protease                          |
| 565302085-565305616 | TraesCS4A01G252900 | Cathepsin B-like cysteine protease                          |
| 565306504-565317251 | TraesCS4A01G253000 | Leishmanolysin-like peptidase                               |

---

---

|                     |                    |                                                                            |
|---------------------|--------------------|----------------------------------------------------------------------------|
| 565430040-565431392 | TraesCS4A01G253100 | F-box protein                                                              |
| 565432182-565433195 | TraesCS4A01G253200 | Photosystem I reaction center subunit N                                    |
| 565433856-565434847 | TraesCS4A01G253300 | Photosystem I reaction center subunit N                                    |
| 565435085-565437902 | TraesCS4A01G253400 | Core-2/I-branching beta-1,6-N-acetylglucosaminyltransferase family protein |
| 565699355-565725725 | TraesCS4A01G253500 | Calcium-transporting ATPase                                                |
| 565732767-565742099 | TraesCS4A01G253600 | Serine carboxypeptidase family protein, expressed                          |
| 565747737-565750618 | TraesCS4A01G253700 | Serine carboxypeptidase family protein, expressed                          |
| 565758829-565762061 | TraesCS4A01G253800 | Serine carboxypeptidase family protein, expressed                          |
| 565841629-565843317 | TraesCS4A01G253900 | Lecithin-cholesterol acyltransferase-like 1                                |
| 566289983-566291447 | TraesCS4A01G254000 | Lecithin-cholesterol acyltransferase-like 1                                |
| 566293430-566300451 | TraesCS4A01G254100 | Ribosomal RNA small subunit methyltransferase F                            |
| 566522605-566526929 | TraesCS4A01G254200 | BSD domain containing protein                                              |
| 566527387-566529939 | TraesCS4A01G254300 | ACT domain containing protein, expressed                                   |
| 566589200-566589644 | TraesCS4A01G254400 | Glutaredoxin, putative                                                     |
| 566609902-566610346 | TraesCS4A01G254500 | Glutaredoxin, putative                                                     |
| 566828841-566830249 | TraesCS4A01G254600 | Thioredoxin-like protein AAED1, chloroplastic                              |
| 566905182-566907692 | TraesCS4A01G254700 | Zinc finger MYM-type-like protein                                          |

---



---

|                     |                    |                    |                                                                   |
|---------------------|--------------------|--------------------|-------------------------------------------------------------------|
| 567036537-567037063 |                    | TraesCS4A01G254800 | Carboxypeptidase                                                  |
| 567037277-567038089 |                    | TraesCS4A01G254900 | CVP2 like 1                                                       |
| 567181746-567185221 |                    | TraesCS4A01G255000 | Growth-regulating factor                                          |
| 567192867-567193136 |                    | TraesCS4A01G255100 | B3 domain-containing protein                                      |
| 567470959-567471646 |                    | TraesCS4A01G255200 | Imidazole glycerol phosphate synthase subunit HisH                |
| 567476443-567479410 |                    | TraesCS4A01G255300 | Ribosomal RNA small subunit methyltransferase E                   |
| 567479603-567482101 | C5                 | TraesCS4A01G255400 | Serine/threonine-protein kinase                                   |
| 567484301-567487389 |                    | TraesCS4A01G255500 | Thioredoxin-like protein AAED1, chloroplastic                     |
| 567489300-567492747 |                    | TraesCS4A01G255600 | transmembrane protein                                             |
| 567493169-567495275 | C18                | TraesCS4A01G255700 | ethylene-dependent gravitropism-deficient and yellow-green-like 2 |
| 567646583-567646825 | <i>AX109496237</i> |                    |                                                                   |
| 567650074-567650374 | <i>AX109001562</i> |                    |                                                                   |
| 567650160-567654340 | C19                | TraesCS4A01G255800 | basic helix-loop-helix (bHLH) DNA-binding superfamily protein     |
| 567667591-567675909 |                    | TraesCS4A01G255900 | ATP dependent RNA helicase                                        |
| 567676134-567678643 |                    | TraesCS4A01G256000 | tRNA pseudouridine synthase                                       |
| 567682081-567685775 |                    | TraesCS4A01G256100 | Pentatricopeptide repeat-containing protein                       |
| 567686918-567691656 |                    | TraesCS4A01G256200 | Chaperone protein DnaJ                                            |

---

---

|                     |                    |                                                               |
|---------------------|--------------------|---------------------------------------------------------------|
| 567696212-567701939 | TraesCS4A01G256300 | GTPase obg                                                    |
| 567706804-567708066 | TraesCS4A01G256400 | F-box family protein                                          |
| 568192908-568194707 | TraesCS4A01G256500 | 1-aminocyclopropane-1-carboxylate synthase 1                  |
| 568507891-568509412 | TraesCS4A01G256600 | Digeranylgeranylglyceryl phosphate synthase                   |
| 569477449-569484409 | TraesCS4A01G256700 | homeobox-1                                                    |
| 569866440-569868731 | TraesCS4A01G256800 | E3 ubiquitin-protein ligase FANCL                             |
| 569869977-569874614 | TraesCS4A01G256900 | Alpha/beta-hydrolase superfamily protein                      |
| 569877552-569878043 | TraesCS4A01G257000 | Epidermal patterning factor-like protein                      |
| 569879972-569882429 | TraesCS4A01G257100 | GDP-mannose transporter                                       |
| 569886103-569892384 | TraesCS4A01G257200 | AMSH-like ubiquitin thioesterase 1                            |
| 570189917-570190999 | TraesCS4A01G257300 | pleiotropic drug resistance 13                                |
| 570262263-570267332 | TraesCS4A01G257400 | Sulfite exporter TauE/SafE family protein                     |
| 570268678-570269961 | TraesCS4A01G257500 | myb-like protein X                                            |
| 570461424-570464905 | TraesCS4A01G257600 | ERD (Early-responsive to dehydration stress) family protein   |
| 570466398-570471904 | TraesCS4A01G257700 | Inositol-tetrakisphosphate 1-kinase                           |
| 570478051-570480540 | TraesCS4A01G257800 | Tubulin alpha chain                                           |
| 570910048-570912528 | TraesCS4A01G257900 | basic helix-loop-helix (bHLH) DNA-binding superfamily protein |

---

---

|                     |                    |                                                                      |
|---------------------|--------------------|----------------------------------------------------------------------|
| 570973087-570978939 | TraesCS4A01G258000 | WD repeat-containing protein                                         |
| 570981432-570985759 | TraesCS4A01G258100 | Lariat debranching enzyme                                            |
| 570988372-570998526 | TraesCS4A01G258200 | Pre-mRNA polyadenylation factor Fip1                                 |
| 571031282-571031596 | TraesCS4A01G258300 | 50S ribosomal protein L6, putative                                   |
| 571040698-571042292 | TraesCS4A01G258400 | Maf-like protein, expressed                                          |
| 571045891-571047818 | TraesCS4A01G258500 | Maf-like protein, expressed                                          |
| 571212794-571214353 | TraesCS4A01G258600 | dipeptide transport ATP-binding protein                              |
| 571297190-571297483 | TraesCS4A01G258700 | Polynucleotidyl transferase, ribonuclease H-like superfamily protein |
| 571359780-571364276 | TraesCS4A01G258800 | Glycine-rich family protein                                          |
| 571483446-571484903 | TraesCS4A01G258900 | Glycosyltransferase                                                  |
| 571586153-571588969 | TraesCS4A01G259000 | dipeptide transport ATP-binding protein                              |
| 571777303-571781968 | TraesCS4A01G259100 | Receptor kinase                                                      |
| 571971770-571972432 | TraesCS4A01G259200 | Ethylene-responsive transcription factor                             |
| 572302274-572303653 | TraesCS4A01G259300 | Anthocyanin 5-aromatic acyltransferase                               |
| 572307556-572308866 | TraesCS4A01G259400 | Anthocyanin 5-aromatic acyltransferase                               |
| 572535158-572539686 | TraesCS4A01G259500 | Sec14p-like phosphatidylinositol transfer family protein             |
| 572541723-572543895 | TraesCS4A01G259600 | Sec14p-like phosphatidylinositol transfer family protein             |

---

---

|                     |                    |                                                          |
|---------------------|--------------------|----------------------------------------------------------|
| 572549945-572551882 | TraesCS4A01G259700 | Sec14p-like phosphatidylinositol transfer family protein |
| 572562465-572571488 | TraesCS4A01G259800 | Alanine--tRNA ligase                                     |
| 572641045-572642412 | TraesCS4A01G259900 | Glycosyltransferase                                      |
| 572649414-572650088 | TraesCS4A01G260000 | Glucans biosynthesis glucosyltransferase H               |
| 572702108-572705852 | TraesCS4A01G260100 | BTB/POZ domain-containing protein                        |
| 572830903-572834487 | TraesCS4A01G260200 | Carbohydrate kinase-like                                 |
| 572836118-572837902 | TraesCS4A01G260300 | Pentatricopeptide repeat-containing protein              |
| 572845556-572846014 | TraesCS4A01G260400 | Histone H2B                                              |
| 572881559-572882628 | TraesCS4A01G260500 | late embryogenesis abundant protein                      |
| 573172063-573173700 | TraesCS4A01G260600 | GRAS transcription factor                                |
| 573316263-573318272 | TraesCS4A01G260700 | tetratricopeptide repeat (TPR)-containing protein        |
| 573321338-573325678 | TraesCS4A01G260800 | Adenylyl cyclase-associated protein                      |
| 573326180-573328349 | TraesCS4A01G260900 | Glucan endo-1,3-beta-glucosidase                         |
| 573358608-573365399 | TraesCS4A01G261000 | ATP-dependent DNA helicase DDM1                          |
| 573367445-573367663 | TraesCS4A01G261100 | Myosin-J heavy chain                                     |
| 573665312-573669541 | TraesCS4A01G261200 | Short-chain dehydrogenase/reductase family protein       |
| 573670487-573671688 | TraesCS4A01G261300 | Phox domain-containing protein, putative isoform 1       |

---

---

|                     |                    |                                                            |
|---------------------|--------------------|------------------------------------------------------------|
| 573672265-573673733 | TraesCS4A01G261400 | tRNA modification GTPase MnmE                              |
| 573878926-573880014 | TraesCS4A01G261500 | Kinase, putative                                           |
| 573886653-573891925 | TraesCS4A01G261600 | SWI/SNF complex subunit SWI3D                              |
| 574158150-574159454 | TraesCS4A01G261700 | Protein with RNI-like/FBD-like domain                      |
| 574167455-574168856 | TraesCS4A01G261800 | Complement decay-accelerating factor transmembrane isoform |
| 574195994-574198659 | TraesCS4A01G261900 | tRNA (Ile)-lysidine synthase                               |
| 574382652-574383662 | TraesCS4A01G262000 | Hyccin protein                                             |
| 574389413-574392229 | TraesCS4A01G262100 | actin cross-linking protein, putative (DUF569)             |
| 574524909-574526893 | TraesCS4A01G262200 | vacuolar protein sorting-associated protein (DUF946)       |
| 574527501-574551311 | TraesCS4A01G262300 | Translational activator GCN1                               |
| 574765952-574766490 | TraesCS4A01G262400 | Heat stress transcription factor A-3                       |
| 574840594-574842011 | TraesCS4A01G262500 | MYB transcription factor                                   |
| 574868896-574872931 | TraesCS4A01G262600 | Glutamate decarboxylase                                    |
| 575006274-575010252 | TraesCS4A01G262700 | Peptide transporter                                        |
| 575011484-575013303 | TraesCS4A01G262800 | Kinase family protein                                      |
| 575027251-575031340 | TraesCS4A01G262900 | Phytochrome                                                |
| 575183261-575191036 | TraesCS4A01G263000 | Inactive peptidyl-prolyl cis-trans isomerase shutdown      |

---

---

|                     |                    |                                                  |
|---------------------|--------------------|--------------------------------------------------|
| 575423699-575430254 | TraesCS4A01G263100 | Protein kinase, putative, expressed              |
| 575735462-575737805 | TraesCS4A01G263200 | Alpha/beta-Hydrolases superfamily protein        |
| 575776753-575781334 | TraesCS4A01G263300 | Transcription factor Inducer of CBF expression 1 |
| 575798573-575801177 | TraesCS4A01G263400 | Helicase, putative                               |
| 575802011-575802988 | TraesCS4A01G263500 | Alpha/beta-Hydrolases superfamily protein        |
| 575808456-575809123 | TraesCS4A01G263600 | Cortical cell-delineating protein                |
| 576036387-576043513 | TraesCS4A01G263700 | transmembrane protein, putative (DUF594)         |
| 576050429-576054653 | TraesCS4A01G263800 | 65-kDa microtubule-associated-like protein       |
| 576157311-576166116 | TraesCS4A01G263900 | Dihydroxyacetone kinase family protein           |
| 576563119-576569037 | TraesCS4A01G264000 | Cytochrome c oxidase assembly protein ctaG       |
| 576575755-576576465 | TraesCS4A01G264100 | Zinc finger homeodomain protein                  |
| 576590321-576596961 | TraesCS4A01G264200 | Cytosolic Fe-S cluster assembly factor CFD1      |
| 576602661-576610351 | TraesCS4A01G264300 | Ankyrin repeat-containing protein, putative      |
| 576702012-576703590 | TraesCS4A01G264400 | Actin                                            |
| 576922793-576924952 | TraesCS4A01G264500 | UV-B-induced protein, chloroplastic              |
| 576930523-576931965 | TraesCS4A01G264600 | UDP-glucose 6-dehydrogenase                      |
| 577042628-577044913 | TraesCS4A01G264700 | Pentatricopeptide repeat-containing protein      |

---

---

|                     |                    |                                                                     |
|---------------------|--------------------|---------------------------------------------------------------------|
| 577048828-577056229 | TraesCS4A01G264800 | Histidine kinase                                                    |
| 577109148-577110539 | TraesCS4A01G264900 | Cytochrome b561 family protein, expressed                           |
| 577115564-577116547 | TraesCS4A01G265000 | Expansin-like protein                                               |
| 577227821-577230321 | TraesCS4A01G265100 | Receptor protein kinase, putative                                   |
| 577468716-577471694 | TraesCS4A01G265200 | PHD finger protein family                                           |
| 577489413-577499663 | TraesCS4A01G265300 | Vam6/Vps39-like protein                                             |
| 577542217-577547732 | TraesCS4A01G265400 | Protein POLLEN DEFECTIVE IN GUIDANCE 1                              |
| 577727666-577732739 | TraesCS4A01G265500 | Squamous cell carcinoma antigen recognized by T-cells 3             |
| 577756937-577761081 | TraesCS4A01G265600 | GPN-loop GTPase-like protein                                        |
| 577806459-577806872 | TraesCS4A01G265700 | Type I inositol-1,4,5-trisphosphate 5-phosphatase CVP2-like protein |
| 577976925-577981919 | TraesCS4A01G265800 | RNA-binding protein 34                                              |
| 578007015-578008028 | TraesCS4A01G265900 | Protein kinase                                                      |
| 578175175-578176188 | TraesCS4A01G266000 | Protein kinase                                                      |
| 578233584-578234588 | TraesCS4A01G266100 | Protein kinase                                                      |
| 578382450-578383463 | TraesCS4A01G266200 | protein kinase family protein                                       |
| 578392878-578393918 | TraesCS4A01G266300 | Protein kinase                                                      |
| 578533601-578539054 | TraesCS4A01G266400 | NADH-ubiquinone oxidoreductase subunit                              |

---

---

|                     |                    |                                                                  |
|---------------------|--------------------|------------------------------------------------------------------|
| 578539799-578540488 | TraesCS4A01G266500 | NADH-ubiquinone oxidoreductase 75 kDa subunit, mitochondrial     |
| 578540922-578547040 | TraesCS4A01G266600 | Dynamin                                                          |
| 578553411-578559697 | TraesCS4A01G266700 | Threonine dehydratase                                            |
| 578573271-578574941 | TraesCS4A01G266800 | Pentatricopeptide repeat-containing protein                      |
| 579428268-579430952 | TraesCS4A01G266900 | Glutamine synthetase                                             |
| 579431789-579438751 | TraesCS4A01G267000 | Phosphoglucosamine mutase                                        |
| 579519072-579523895 | TraesCS4A01G267100 | IGR motif protein                                                |
| 579526333-579529059 | TraesCS4A01G267200 | ATP-dependent Clp protease ATP-binding subunit                   |
| 579609654-579612522 | TraesCS4A01G267300 | Receptor-like kinase                                             |
| 579848008-579850633 | TraesCS4A01G267400 | DNA (Cytosine-5-)-methyltransferase                              |
| 579853617-579857109 | TraesCS4A01G267500 | Ubiquitin-conjugating enzyme, E2                                 |
| 579860024-579863556 | TraesCS4A01G267600 | Zinc finger protein VAR3, chloroplastic                          |
| 579864436-579866269 | TraesCS4A01G267700 | Zinc-finger domain of monoamine-oxidase A repressor R1, putative |
| 580288521-580301691 | TraesCS4A01G267800 | Kinase, putative                                                 |
| 580302974-580304107 | TraesCS4A01G267900 | DNA-directed RNA polymerase subunit                              |
| 580477666-580478491 | TraesCS4A01G268000 | Histone H1, putative                                             |
| 580485261-580490042 | TraesCS4A01G268100 | Coatomer subunit alpha                                           |

---



---

|                     |                    |                                                                  |
|---------------------|--------------------|------------------------------------------------------------------|
| 580654977-580661304 | TraesCS4A01G268200 | Protein kinase                                                   |
| 580707381-580729754 | TraesCS4A01G268300 | Phosphatidylinositol 4-kinase                                    |
| 580730452-580731116 | TraesCS4A01G268400 | V-type proton ATPase subunit D                                   |
| 580734487-580735937 | TraesCS4A01G268500 | CONSTANS-like zinc finger protein                                |
| 580895092-580903002 | TraesCS4A01G268600 | Protein CASP                                                     |
| 580906525-580908057 | TraesCS4A01G268700 | 14-3-3 protein                                                   |
| 581142969-581144505 | TraesCS4A01G268800 | Accelerated cell death 11                                        |
| 581148192-581149603 | TraesCS4A01G268900 | AT-rich interactive domain protein                               |
| 581150955-581151197 | TraesCS4A01G269000 | Acetyl-coenzyme A carboxylase carboxyl transferase subunit alpha |
| 581191895-581195807 | TraesCS4A01G269100 | Protein kinase-like protein                                      |
| 581196871-581204088 | TraesCS4A01G269200 | Homologous-pairing protein 2-like protein                        |
| 581200222-581201286 | TraesCS4A01G269300 | Regulator of Vps4 activity in the MVB pathway protein, putative  |
| 581270007-581270784 | TraesCS4A01G269400 | Basic blue protein                                               |
| 581274002-581275039 | TraesCS4A01G269500 | Basic blue protein                                               |
| 581278184-581279746 | TraesCS4A01G269600 | Microsomal glutathione S-transferase 3                           |
| 581324889-581326814 | TraesCS4A01G269700 | Microsomal glutathione S-transferase 3                           |
| 581329766-581330881 | TraesCS4A01G269800 | Microsomal glutathione S-transferase 3                           |

---

---

|                     |                    |                                                                   |
|---------------------|--------------------|-------------------------------------------------------------------|
| 581331452-581336479 | TraesCS4A01G269900 | Zinc finger protein VAR3, chloroplastic                           |
| 581455498-581456574 | TraesCS4A01G270000 | DNA-binding storekeeper protein-related transcriptional regulator |
| 581467493-581471226 | TraesCS4A01G270100 | Myosin-binding protein 2                                          |
| 581481563-581483746 | TraesCS4A01G270200 | ATP-dependent RNA helicase                                        |
| 581493890-581494297 | TraesCS4A01G270300 | 60S ribosomal protein L5                                          |
| 581749794-581750715 | TraesCS4A01G270400 | Peptidylprolyl isomerase                                          |
| 581751238-581754972 | TraesCS4A01G270500 | 3-oxo-5-alpha-steroid 4-dehydrogenase                             |
| 581759713-581760915 | TraesCS4A01G270600 | F-box family protein                                              |
| 581867995-581871066 | TraesCS4A01G270700 | Phytanoyl-CoA dioxygenase family protein                          |
| 581916832-581917610 | TraesCS4A01G270800 | Phospholipase A2                                                  |
| 581934950-581944657 | TraesCS4A01G270900 | Glutamyl-tRNA(Gln) amidotransferase subunit A                     |
| 582477716-582479578 | TraesCS4A01G271000 | GAI-like protein 1                                                |
| 582507114-582510391 | TraesCS4A01G271100 | Drug/metabolite transporter                                       |
| 582524342-582534665 | TraesCS4A01G271200 | Transmembrane fragile-X-F-associated protein                      |
| 582839931-582840989 | TraesCS4A01G271300 | Transcription factor TEOSINTE BRANCHED 1                          |
| 583150186-583155216 | TraesCS4A01G271400 | RuvB-like helicase                                                |
| 583162282-583163565 | TraesCS4A01G271500 | Fantastic four-like protein                                       |

---

---

|                     |                 |                    |                                                                 |
|---------------------|-----------------|--------------------|-----------------------------------------------------------------|
| 583419318-583422909 |                 | TraesCS4A01G271600 | Phosphatidylinositol-4-phosphate 5-kinase, putative             |
| 583525525-583534431 |                 | TraesCS4A01G271700 | Oxysterol-binding protein, putative                             |
| 583702432-583707366 |                 | TraesCS4A01G271800 | Kinase family protein                                           |
| 583707903-583717668 |                 | TraesCS4A01G271900 | Histone-lysine N-methyltransferase                              |
| 583754800-583757140 | C8              | TraesCS4A01G272000 | Plastid-lipid associated protein PAP / fibrillin family protein |
| 583756221-583756371 | <i>BE403251</i> |                    |                                                                 |
| 583757696-583759270 |                 | TraesCS4A01G272100 | 30S ribosomal protein S13, putative, expressed                  |
| 583760272-583763441 |                 | TraesCS4A01G272200 | SNARE associated Golgi protein family                           |
| 583867353-583867884 |                 | TraesCS4A01G272300 | BnaA04g06320D protein                                           |
| 583869145-583869366 |                 | TraesCS4A01G272400 | 50S ribosomal protein L33                                       |
| 583899849-583905113 |                 | TraesCS4A01G272500 | Protein kinase                                                  |
| 583906671-583910180 |                 | TraesCS4A01G272600 | Mitogen-activated protein kinase kinase kinase 1                |
| 583914291-583915891 |                 | TraesCS4A01G272700 | Zinc finger family protein                                      |
| 583936151-583946383 |                 | TraesCS4A01G272800 | Beta-glucosidase                                                |
| 583949402-583953409 | C9              | TraesCS4A01G272900 | Beta-glucosidase                                                |
| 583949552-583949670 | <i>BE403721</i> |                    |                                                                 |
| 583959345-583960583 |                 | TraesCS4A01G273000 | Ubiquitin-conjugating enzyme E2 B                               |

---

---

|                     |                    |                                                                 |
|---------------------|--------------------|-----------------------------------------------------------------|
| 583969485-583970798 | TraesCS4A01G273100 | Eukaryotic peptide chain release factor subunit 1-1             |
| 583975054-583980304 | TraesCS4A01G273200 | Nucleotide-sugar transporter family protein                     |
| 584040603-584042579 | TraesCS4A01G273300 | Leucine-rich repeat receptor-like protein kinase family protein |
| 584046355-584046963 | TraesCS4A01G273400 | S-adenosylmethionine decarboxylase proenzyme                    |
| 584055111-584056903 | TraesCS4A01G273500 | Glycosyltransferase                                             |
| 584062945-584068329 | TraesCS4A01G273600 | Protein-protein interaction regulator                           |
| 584071841-584072942 | TraesCS4A01G273700 | Cysteine protease, putative                                     |
| 584108425-584112758 | TraesCS4A01G273800 | Cysteine protease, putative                                     |
| 584111584-584111871 | TraesCS4A01G273900 | Cysteine protease, putative                                     |
| 584114748-584115922 | TraesCS4A01G274000 | Cysteine protease, putative                                     |
| 584117906-584119065 | TraesCS4A01G274100 | Cysteine protease, putative                                     |
| 584119978-584125481 | TraesCS4A01G274200 | Phosphatidylinositol-4-phosphate 5-kinase family protein        |
| 584272892-584276246 | TraesCS4A01G274300 | Ethylene receptor                                               |
| 584308413-584308760 | TraesCS4A01G274400 | transmembrane protein, putative (DUF247)                        |
| 584308844-584313947 | TraesCS4A01G274500 | transmembrane protein, putative (DUF247)                        |
| 584346191-584346772 | TraesCS4A01G274600 | DUF1764 domain-containing protein                               |
| 584349415-584352161 | TraesCS4A01G274700 | RING finger protein                                             |

---

---

|                     |                           |                                                     |
|---------------------|---------------------------|-----------------------------------------------------|
| 584382161-584387379 | TraesCS4A01G274800        | Retrotransposon protein, putative, unclassified     |
| 584388183-584389166 | TraesCS4A01G274900        | Elongation of very long chain fatty acids protein 3 |
| 584517620-584517790 | TraesCS4A01G275000        | RING/U-box superfamily protein                      |
| 584520126-584522528 | TraesCS4A01G275100        | Pentatricopeptide repeat-containing protein         |
| 584523426-584525657 | TraesCS4A01G275200        | spindle pole body-associated protein                |
| 584532753-584535075 | TraesCS4A01G275300        | Haloacid dehalogenase-like hydrolase                |
| 584537677-584539036 | TraesCS4A01G275400        | Pre-mRNA-splicing factor 18                         |
| 584543987-584553685 | TraesCS4A01G275500        | Importin-5                                          |
| 584663429-584669278 | TraesCS4A01G275600        | Divalent metal cation transporter MntH 2            |
| 584672019-584675743 | TraesCS4A01G275700        | F-box protein                                       |
| 584679839-584680678 | TraesCS4A01G275800        | Lipoxygenase                                        |
| 584694417-584699590 | TraesCS4A01G275900        | Lipoxygenase                                        |
| 584735545-584738842 | TraesCS4A01G276000        | Lipoxygenase                                        |
| 584783153-584785124 | TraesCS4A01G276100        | Laccase                                             |
| 584797507-584800051 | TraesCS4A01G276200        | N-acetyltransferase, putative                       |
| 584810980-584813007 | TraesCS4A01G276300        | Adenylosuccinate synthetase                         |
| 584817688-584823187 | C10<br>TraesCS4A01G276400 | Pescadillo homolog                                  |

---

---

|                     |                   |                    |                                                                  |
|---------------------|-------------------|--------------------|------------------------------------------------------------------|
| 584818692-584818992 | <i>AX86179210</i> |                    |                                                                  |
| 584882453-584885501 |                   | TraesCS4A01G276500 | WD-repeat protein, putative                                      |
| 584931338-584934198 |                   | TraesCS4A01G276600 | Alkaline ceramidase 3                                            |
| 584936954-584939511 |                   | TraesCS4A01G276700 | Zinc finger CCCH domain-containing protein                       |
| 584969965-584973282 |                   | TraesCS4A01G276800 | Protein yippee-like                                              |
| 585027950-585033320 |                   | TraesCS4A01G276900 | polyketide cyclase/dehydrase/lipid transport superfamily protein |
| 585054611-585060791 |                   | TraesCS4A01G277000 | Antimicrobial peptide MBP-1                                      |
| 585094397-585099779 |                   | TraesCS4A01G277100 | Protein kinase superfamily protein                               |
| 585209875-585211659 |                   | TraesCS4A01G277200 | Cytokinin riboside 5'-monophosphate phosphoribohydrolase         |
| 585376976-585379886 |                   | TraesCS4A01G277300 | Nuclear transcription factor Y subunit                           |
| 585395987-585396268 |                   | TraesCS4A01G277400 | Ran-binding protein 3                                            |
| 585396723-585400936 |                   | TraesCS4A01G277500 | Late embryogenesis abundant hydroxyproline-rich glycoprotein     |
| 585432085-585444318 |                   | TraesCS4A01G277600 | Chloride channel protein                                         |
| 585456231-585458315 |                   | TraesCS4A01G277700 | Proteasome subunit beta type                                     |
| 585459229-585463234 |                   | TraesCS4A01G277800 | Myelin-associated oligodendrocyte basic protein isoform 1        |
| 585539981-585541802 |                   | TraesCS4A01G277900 | Cytochrome P450 family protein, expressed                        |
| 585556795-585557127 |                   | TraesCS4A01G278000 | RING/U-box superfamily protein                                   |

---

---

|                     |                    |                                                                       |
|---------------------|--------------------|-----------------------------------------------------------------------|
| 585646903-585647766 | TraesCS4A01G278100 | Leucine-rich repeat receptor-like protein kinase                      |
| 585679342-585679971 | TraesCS4A01G278200 | Retrovirus-related Pol polyprotein from transposon 297 family         |
| 585687148-585693746 | TraesCS4A01G278300 | Ankyrin repeat family protein                                         |
| 586085800-586087244 | TraesCS4A01G278400 | Gag-pol polyprotein                                                   |
| 586431958-586436984 | TraesCS4A01G278500 | Lysine--tRNA ligase                                                   |
| 586437450-586437794 | TraesCS4A01G278600 | 50S ribosomal protein L18                                             |
| 586439529-586442039 | TraesCS4A01G278700 | 30S ribosomal protein S21                                             |
| 586449768-586452785 | TraesCS4A01G278800 | Nucleobase ascorbate transporter                                      |
| 586501219-586501902 | TraesCS4A01G278900 | Germin-like protein 1-1                                               |
| 586674210-586678377 | TraesCS4A01G279000 | Ankyrin-repeat containing protein, putative                           |
| 586682057-586682725 | TraesCS4A01G279100 | Germin-like protein 1-1                                               |
| 586699223-586699897 | TraesCS4A01G279200 | Germin-like protein 1                                                 |
| 586708732-586709403 | TraesCS4A01G279300 | Germin-like protein                                                   |
| 586726830-586728762 | TraesCS4A01G279400 | Glycosyltransferase                                                   |
| 586731120-586731695 | TraesCS4A01G279500 | DUF538 family protein, putative (Protein of unknown function, DUF538) |
| 586732683-586737962 | TraesCS4A01G279600 | tRNA (Ile)-lysidine synthase                                          |
| 586857087-586858056 | TraesCS4A01G279700 | DEAD box RNA helicase family protein                                  |

---

---

|                     |                    |                                                                             |
|---------------------|--------------------|-----------------------------------------------------------------------------|
| 587327316-587331588 | TraesCS4A01G279800 | Protein ENHANCED DISEASE RESISTANCE 2                                       |
| 587724356-587724601 | TraesCS4A01G279900 | Cytochrome bc1 complex cytochrome b subunit                                 |
| 588584846-588586918 | TraesCS4A01G280000 | Glycine-rich family protein                                                 |
| 588633613-588643252 | TraesCS4A01G280100 | Heat stress transcription factor A-9                                        |
| 588658822-588659109 | TraesCS4A01G280200 | B3 domain-containing protein family                                         |
| 588744270-588744707 | TraesCS4A01G280300 | Neurogenic differentiation factor 1                                         |
| 588931457-588932492 | TraesCS4A01G280400 | Phenylalanine--tRNA ligase alpha subunit                                    |
| 588939567-588940103 | TraesCS4A01G280500 | DUF538 family protein, putative (Protein of unknown function, DUF538)       |
| 589011555-589015342 | TraesCS4A01G280600 | DUF538 family protein, putative (Protein of unknown function, DUF538)       |
| 589085090-589089709 | TraesCS4A01G280700 | Beta-1,3-galactosyltransferase-like protein                                 |
| 589108224-589111769 | TraesCS4A01G280800 | Protein UPSTREAM OF FLC                                                     |
| 589321088-589321744 | TraesCS4A01G280900 | Disease resistance protein RPM1                                             |
| 589472934-589473664 | TraesCS4A01G281000 | Clavata3/ESR (CLE) gene family member                                       |
| 589486132-589487151 | TraesCS4A01G281100 | F-box family protein                                                        |
| 589494063-589497494 | TraesCS4A01G281200 | Phosphatidylinositol N-acetylglucosaminyltransferase subunit P-like protein |
| 589499333-589501718 | TraesCS4A01G281300 | Core-2/I-branching beta-1,6-N-acetylglucosaminyltransferase family protein  |
| 589503363-589507880 | TraesCS4A01G281400 | Hedgehog-interacting-like protein                                           |

---



---

|                     |                    |                                                             |
|---------------------|--------------------|-------------------------------------------------------------|
| 589586237-589592352 | TraesCS4A01G281500 | Nuclease domain-containing protein 1                        |
| 589600379-589601125 | TraesCS4A01G281600 | Octicosapeptide/Phox/Bem1p domain-containing family protein |
| 589602948-589607173 | TraesCS4A01G281700 | BHLH family protein, putative, expressed                    |
| 589661425-589662527 | TraesCS4A01G281800 | Thioesterase family protein                                 |
| 589777427-589780505 | TraesCS4A01G281900 | Receptor kinase                                             |
| 589787393-589791663 | TraesCS4A01G282000 | Serine/threonine-protein kinase                             |
| 589812884-589814112 | TraesCS4A01G282100 | Thioesterase family protein                                 |
| 589835032-589836210 | TraesCS4A01G282200 | Thioesterase family protein                                 |
| 589842588-589846517 | TraesCS4A01G282300 | Serine/threonine-protein kinase                             |
| 589878969-589879889 | TraesCS4A01G282400 | RNA-binding family protein isoform 1                        |
| 590088220-590091470 | TraesCS4A01G282500 | TBC1 domain family member                                   |
| 590092917-590098247 | TraesCS4A01G282600 | FBD-associated F-box protein                                |
| 590103056-590105464 | TraesCS4A01G282700 | Costars family protein                                      |
| 590107460-590112275 | TraesCS4A01G282800 | Tetratricopeptide repeat protein 38                         |
| 590112905-590117974 | TraesCS4A01G282900 | Plasma membrane ATPase                                      |
| 590123388-590126855 | TraesCS4A01G283000 | B3 domain-containing protein                                |
| 590180868-590186819 | TraesCS4A01G283100 | Plasma membrane ATPase                                      |

---

---

|                     |                    |                                                                          |
|---------------------|--------------------|--------------------------------------------------------------------------|
| 590204451-590236014 | TraesCS4A01G283200 | Inositol hexakisphosphate and diphosphoinositol-pentakisphosphate kinase |
| 590265720-590267385 | TraesCS4A01G283300 | Mediator complex, subunit Med7                                           |
| 590277427-590280648 | TraesCS4A01G283400 | Calcium-dependent protein kinase                                         |
| 590498160-590502931 | TraesCS4A01G283500 | Glycine-rich family protein                                              |
| 590586089-590588803 | TraesCS4A01G283600 | Leucine-rich repeat protein kinase family protein                        |
| 590590295-590593639 | TraesCS4A01G283700 | Hexosyltransferase                                                       |
| 590625494-590626216 | TraesCS4A01G283800 | 60S ribosomal protein L35a-like protein                                  |
| 590656013-590660306 | TraesCS4A01G283900 | NRT1/PTR family protein 2.2                                              |
| 590661142-590667513 | TraesCS4A01G284000 | 5'-AMP-activated protein kinase subunit beta-2                           |
| 590900054-590900341 | TraesCS4A01G284100 | NADH-ubiquinone oxidoreductase subunit                                   |
| 590901321-590912748 | TraesCS4A01G284200 | Calcineurin-binding protein cabin-1                                      |
| 590935529-590935893 | TraesCS4A01G284300 | Protein NRT1/ PTR FAMILY 5.1                                             |
| 590942611-590945363 | TraesCS4A01G284400 | GMP synthase [glutamine-hydrolyzing]                                     |
| 590987939-590989668 | TraesCS4A01G284500 | rRNA methyltransferase                                                   |
| 590993812-590999321 | TraesCS4A01G284600 | Tesmin/TSO1-like CXC domain-containing protein                           |
| 591070502-591074036 | TraesCS4A01G284700 | WAT1-related protein                                                     |
| 591283782-591284566 | TraesCS4A01G284800 | Pollen allergen                                                          |

---

---

|                     |                    |                                                             |
|---------------------|--------------------|-------------------------------------------------------------|
| 591293757-591294554 | TraesCS4A01G284900 | Pollen allergen Phl p 5                                     |
| 591347606-591348302 | TraesCS4A01G285000 | Pollen allergen Phl p 5                                     |
| 591505601-591506486 | TraesCS4A01G285100 | Transcription elongation factor 1                           |
| 591508137-591509534 | TraesCS4A01G285200 | Agmatine coumaroyltransferase-2                             |
| 591522546-591523056 | TraesCS4A01G285300 | C2 calcium/lipid-binding and GRAM domain containing protein |
| 591558800-591559460 | TraesCS4A01G285400 | Protein FAR1-RELATED SEQUENCE 5                             |
| 591674857-591675826 | TraesCS4A01G285500 | Pollen allergen Phl p 5                                     |
| 591691741-591693220 | TraesCS4A01G285600 | zinc finger MYM-type-like protein                           |
| 591696343-591699344 | TraesCS4A01G285700 | GDSL esterase/lipase                                        |
| 591700622-591709892 | TraesCS4A01G285800 | E3 ubiquitin-protein ligase                                 |
| 591711407-591715393 | TraesCS4A01G285900 | GATA transcription factor                                   |
| 591845836-591851939 | TraesCS4A01G286000 | ARM repeat superfamily protein                              |
| 591854869-591856904 | TraesCS4A01G286100 | RecQ-mediated genome instability protein 2                  |
| 591861715-591862961 | TraesCS4A01G286200 | Aquaporin                                                   |
| 591864044-591866358 | TraesCS4A01G286300 | RecQ-mediated genome instability protein 2                  |
| 591868807-591873831 | TraesCS4A01G286400 | Magnesium transporter MRS2-like protein                     |
| 591874904-591877475 | TraesCS4A01G286500 | Exostosin-2                                                 |

---

---

|                     |                    |                                                             |
|---------------------|--------------------|-------------------------------------------------------------|
| 591877897-591880030 | TraesCS4A01G286600 | Integral membrane HPP family protein                        |
| 591919611-591921968 | TraesCS4A01G286700 | Ferredoxin family protein, expressed                        |
| 592308951-592309850 | TraesCS4A01G286800 | Pollen allergen Phl p 5                                     |
| 592334826-592335807 | TraesCS4A01G286900 | Pollen allergen Phl p 5                                     |
| 592361121-592362093 | TraesCS4A01G287000 | Pollen allergen Phl p 5                                     |
| 592486684-592491531 | TraesCS4A01G287100 | Hippocampus abundant transcript-like protein 1              |
| 592521252-592521762 | TraesCS4A01G287200 | C2 calcium/lipid-binding and GRAM domain containing protein |
| 592543631-592547201 | TraesCS4A01G287300 | Peptide transporter                                         |
| 592762587-592763248 | TraesCS4A01G287400 | Protein FAR1-RELATED SEQUENCE 5                             |
| 592820500-592821897 | TraesCS4A01G287500 | Agmatine coumaroyltransferase-2                             |
| 592926089-592927358 | TraesCS4A01G287600 | Pollen allergen Phl p 5                                     |
| 593100272-593100766 | TraesCS4A01G287700 | Agmatine coumaroyltransferase-2                             |
| 593105774-593106658 | TraesCS4A01G287800 | Transcription elongation factor 1                           |
| 593113190-593115887 | TraesCS4A01G287900 | Peptide transporter                                         |
| 593194498-593201017 | TraesCS4A01G288000 | Argonaute protein                                           |
| 593204562-593205374 | TraesCS4A01G288100 | DUF674 family protein                                       |
| 593208070-593208944 | TraesCS4A01G288200 | DUF674 family protein                                       |

---

---

|                     |                    |                                                                 |
|---------------------|--------------------|-----------------------------------------------------------------|
| 593278588-593284719 | TraesCS4A01G288300 | Argonaute family protein                                        |
| 593288154-593290058 | TraesCS4A01G288400 | Nodulin-like / Major Facilitator Superfamily protein            |
| 593333205-593337537 | TraesCS4A01G288500 | RNA-binding protein                                             |
| 593349509-593353817 | TraesCS4A01G288600 | WD40 repeat-like protein                                        |
| 593354895-593357505 | TraesCS4A01G288700 | Beta-xylosidase, putative                                       |
| 593376570-593380773 | TraesCS4A01G288800 | Ubiquitin-conjugating enzyme E2                                 |
| 593495080-593495886 | TraesCS4A01G288900 | rRNA N-glycosidase                                              |
| 593683757-593684092 | TraesCS4A01G289000 | Acetyl-coenzyme A carboxylase carboxyl transferase subunit beta |
| 593732899-593733846 | TraesCS4A01G289100 | F-box domain containing protein                                 |
| 593735559-593753492 | TraesCS4A01G289200 | Golgi-body localization protein domain isoform 1                |
| 593761646-593766038 | TraesCS4A01G289300 | Serine/arginine rich splicing factor, putative                  |
| 593915422-593918768 | TraesCS4A01G289400 | Homeobox protein BEL1 like                                      |
| 594002643-594004359 | TraesCS4A01G289500 | BEL1-like homeodomain protein                                   |
| 594005332-594010128 | TraesCS4A01G289600 | Ankyrin repeat family protein                                   |
| 594028246-594033990 | TraesCS4A01G289700 | Ankyrin repeat family protein                                   |
| 594039386-594040785 | TraesCS4A01G289800 | Leucine-rich repeat-containing protein 40                       |
| 594129754-594138636 | TraesCS4A01G289900 | Ankyrin repeat protein-like                                     |

---

---

|                     |                 |                    |                                            |
|---------------------|-----------------|--------------------|--------------------------------------------|
| 594140562-594147562 |                 | TraesCS4A01G290000 | Ankyrin repeat family protein              |
| 594150389-594160413 |                 | TraesCS4A01G290100 | Ankyrin repeat protein-like                |
| 594162606-594167272 | C11             | TraesCS4A01G290200 | Ankyrin repeat protein-like                |
| 594165370-594165403 | <i>BE406959</i> |                    |                                            |
| 594180504-594186598 |                 | TraesCS4A01G290300 | Ankyrin repeat family protein              |
| 594212051-594212608 | <i>BE591356</i> |                    |                                            |
| 594213511-594217122 | C12             | TraesCS4A01G290400 | Phosphomethylpyrimidine synthase           |
| 594269604-594270674 |                 | TraesCS4A01G290500 | Hexosyltransferase                         |
| 594283074-594284324 |                 | TraesCS4A01G290600 | E3 ubiquitin-protein ligase                |
| 594350894-594351879 |                 | TraesCS4A01G290700 | AGAMOUS-like MADS-box transcription factor |
| 594364173-594364763 |                 | TraesCS4A01G290800 | VQ motif-containing protein                |
| 594367077-594367568 |                 | TraesCS4A01G290900 | Glycine-rich protein                       |
| 594378156-594378956 |                 | TraesCS4A01G291000 | Thymocyte nuclear protein 1                |
| 594392621-594393043 |                 | TraesCS4A01G291100 | myosin XI D                                |
| 594427650-594428144 |                 | TraesCS4A01G291200 | BZIP transcription factor                  |
| 594441999-594443029 |                 | TraesCS4A01G291300 | Neuropeptide Y receptor type 1             |
| 594460318-594460773 |                 | TraesCS4A01G291400 | Fasciclin-like arabinogalactan protein 16  |

---

---

|                     |                    |                                                               |
|---------------------|--------------------|---------------------------------------------------------------|
| 594533060-594535487 | TraesCS4A01G291500 | Growth-regulating factor                                      |
| 594663909-594668712 | TraesCS4A01G291600 | DUF21 domain-containing protein                               |
| 594680010-594686220 | TraesCS4A01G291700 | ERD (Early-responsive to dehydration stress) family protein   |
| 594700662-594700862 | TraesCS4A01G291800 | double-stranded-RNA-binding protein 4                         |
| 594706438-594711422 | TraesCS4A01G291900 | homeobox-1                                                    |
| 594730519-594732003 | TraesCS4A01G292000 | Homeobox transcription factor KN2                             |
| 594737676-594742642 | TraesCS4A01G292100 | homeobox-1                                                    |
| 595046191-595056136 | TraesCS4A01G292200 | Homeobox protein knotted-1-like 1                             |
| 595192015-595194917 | TraesCS4A01G292300 | Endo-1,4-beta-xylanase, putative, expressed                   |
| 595216786-595217267 | TraesCS4A01G292400 | Epidermal patterning factor-like protein                      |
| 595255785-595257327 | TraesCS4A01G292500 | Chalcone synthase                                             |
| 595262203-595264949 | TraesCS4A01G292600 | Transmembrane protein, putative                               |
| 595282332-595284053 | TraesCS4A01G292700 | basic helix-loop-helix (bHLH) DNA-binding superfamily protein |
| 595294357-595296747 | TraesCS4A01G292800 | basic helix-loop-helix (bHLH) DNA-binding superfamily protein |
| 595329657-595352176 | TraesCS4A01G292900 | ADP-ribosylation factor                                       |
| 595359708-595360304 | TraesCS4A01G293000 | RNA-binding protein                                           |
| 595374853-595376903 | TraesCS4A01G293100 | NADH-ubiquinone oxidoreductase chain 5                        |

---

---

|                     |                    |                                                               |
|---------------------|--------------------|---------------------------------------------------------------|
| 595382839-595387139 | TraesCS4A01G293200 | Pentatricopeptide repeat-containing protein                   |
| 595388538-595396020 | TraesCS4A01G293300 | Tryptophan--tRNA ligase                                       |
| 595391148-595393497 | TraesCS4A01G293400 | Hsp70-Hsp90 organizing protein 1                              |
| 595417616-595419298 | TraesCS4A01G293500 | Glucan endo-1,3-beta-glucosidase                              |
| 595422877-595424025 | TraesCS4A01G293600 | Ubiquitin carboxyl-terminal hydrolase-like protein            |
| 595442919-595443945 | TraesCS4A01G293700 | SBP (S-ribonuclease-binding protein) family protein, putative |
| 595545817-595549141 | TraesCS4A01G293800 | Acidic leucine-rich nuclear phosphoprotein 32-related protein |
| 595549815-595550617 | TraesCS4A01G293900 | Deoxyuridine 5'-triphosphate nucleotidohydrolase              |
| 595552210-595557131 | TraesCS4A01G294000 | Guanine nucleotide-binding protein subunit beta               |
| 595563706-595571876 | TraesCS4A01G294100 | Aminopeptidase                                                |
| 595655367-595659110 | TraesCS4A01G294200 | Zinc transporter                                              |
| 595661422-595663903 | TraesCS4A01G294300 | Zinc transporter                                              |
| 595817811-595821043 | TraesCS4A01G294400 | Regulatory protein NPR1                                       |
| 595844117-595846462 | TraesCS4A01G294500 | Transmembrane protein 56                                      |
| 595847372-595852760 | TraesCS4A01G294600 | Ras family protein                                            |
| 595873167-595876206 | TraesCS4A01G294700 | Trihelix transcription factor GT-4-like protein               |
| 595978865-595983627 | TraesCS4A01G294800 | Pleckstrin-like (PH) domain protein                           |

---



---

|                     |                    |                                                                                                                  |
|---------------------|--------------------|------------------------------------------------------------------------------------------------------------------|
| 595984431-595989792 | TraesCS4A01G294900 | Guanine nucleotide exchange family protein                                                                       |
| 595994746-595997670 | TraesCS4A01G295000 | Kinesin-like protein                                                                                             |
| 596002078-596002431 | TraesCS4A01G295100 | DUF1677 family protein                                                                                           |
| 596075859-596076185 | TraesCS4A01G295200 | UvrABC system protein C                                                                                          |
| 596159177-596161899 | TraesCS4A01G295300 | senescence-associated family protein, putative (DUF581)                                                          |
| 596165884-596166559 | TraesCS4A01G295400 | Acetyltransferase, GNAT family protein, expressed                                                                |
| 596166617-596167246 | TraesCS4A01G295500 | Acetyltransferase, GNAT family protein, expressed                                                                |
| 596214978-596215939 | TraesCS4A01G295600 | Lipid transfer protein                                                                                           |
| 596221994-596223703 | TraesCS4A01G295700 | PHP                                                                                                              |
| 596238333-596239331 | TraesCS4A01G295800 | Lipid transfer protein                                                                                           |
| 596297994-596300601 | TraesCS4A01G295900 | Nuclear transport factor 2 (NTF2) family protein with RNA binding (RRM-RBD-RNP motifs) domain-containing protein |
| 596304904-596307334 | TraesCS4A01G296000 | Globulin 1                                                                                                       |
| 596446060-596448236 | TraesCS4A01G296100 | Globulin 1                                                                                                       |
| 596504054-596509118 | TraesCS4A01G296200 | Type I inositol-1,4,5-trisphosphate 5-phosphatase CVP2                                                           |
| 596523171-596523860 | TraesCS4A01G296300 | Thaumatococcus-like protein                                                                                      |
| 596537351-596537656 | TraesCS4A01G296400 | Thaumatococcus-like protein                                                                                      |

---

---

|                     |                    |                                                                                      |
|---------------------|--------------------|--------------------------------------------------------------------------------------|
| 596570488-596571926 | TraesCS4A01G296500 | Ethylene-responsive nuclear / ethylene-regulated nuclear protein (ERT2)-like protein |
| 596624604-596628189 | TraesCS4A01G296600 | Tubulin beta chain                                                                   |
| 596672137-596673917 | TraesCS4A01G296700 | E3 ubiquitin-protein ligase                                                          |
| 596680691-596680954 | TraesCS4A01G296800 | SAUR-like auxin-responsive protein family                                            |
| 596688333-596688617 | TraesCS4A01G296900 | SAUR-like auxin-responsive protein family                                            |
| 596713062-596713349 | TraesCS4A01G297000 | SAUR-like auxin-responsive protein family                                            |
| 596738067-596738378 | TraesCS4A01G297100 | SAUR-like auxin-responsive protein family                                            |
| 596743214-596743525 | TraesCS4A01G297200 | SAUR-like auxin-responsive protein family                                            |
| 596758261-596765940 | TraesCS4A01G297300 | S3 self-incompatibility locus-linked pollen protein                                  |
| 596767433-596769827 | TraesCS4A01G297400 | PH-response transcription factor pacC/RIM101 isoform 2                               |
| 596770660-596773730 | TraesCS4A01G297500 | LOB domain protein                                                                   |
| 596789012-596792340 | TraesCS4A01G297600 | Pre-rRNA-processing protein TSR2                                                     |
| 596817382-596821918 | TraesCS4A01G297700 | DWNN domain, a CCHC-type zinc finger                                                 |
| 596825257-596827047 | TraesCS4A01G297800 | Lactoylglutathione lyase                                                             |
| 596827940-596828380 | TraesCS4A01G297900 | Ferredoxin                                                                           |
| 596835928-596840310 | TraesCS4A01G298000 | TATA-box-binding protein                                                             |

---

---

|                     |                 |                    |                                                                       |
|---------------------|-----------------|--------------------|-----------------------------------------------------------------------|
| 596920259-596923717 |                 | TraesCS4A01G298100 | N utilization substance protein B-like protein                        |
| 597013077-597015822 |                 | TraesCS4A01G298200 | Glucan endo-1,3-beta-glucosidase, putative                            |
| 597023208-597024827 | C13             | TraesCS4A01G298300 | Non specific phospholipase C                                          |
| 597024543-597025097 | <i>BE637642</i> |                    |                                                                       |
| 597052406-597054154 | C14             | TraesCS4A01G298400 | Cation calcium exchanger                                              |
| 597668209-597670977 |                 | TraesCS4A01G298500 | Chaperone protein DnaJ                                                |
| 597671700-597672868 |                 | TraesCS4A01G298600 | Heat shock family protein                                             |
| 597677918-597682345 |                 | TraesCS4A01G298700 | 5-methyltetrahydropteroyltriglutamate--homocysteine methyltransferase |
| 597688356-597694717 |                 | TraesCS4A01G298800 | Protein FAR1-RELATED SEQUENCE 5                                       |
| 597714516-597715616 |                 | TraesCS4A01G298900 | Potassium channel                                                     |
| 597724268-597725956 |                 | TraesCS4A01G299000 | Ankyrin repeat-containing protein                                     |
| 597754246-597754554 |                 | TraesCS4A01G299100 | Dehydrin family protein, expressed                                    |
| 597826624-597830284 |                 | TraesCS4A01G299200 | HSP20-like chaperone superfamily protein                              |
| 597833941-597837160 |                 | TraesCS4A01G299300 | Membrin                                                               |
| 597841374-597845533 |                 | TraesCS4A01G299400 | Short-chain dehydrogenase/reductase family protein                    |
| 597855871-597861216 |                 | TraesCS4A01G299500 | Polyribonucleotide nucleotidyltransferase                             |
| 597886889-597888409 |                 | TraesCS4A01G299600 | Glycosyltransferase                                                   |

---

---

|                     |                    |                                                  |
|---------------------|--------------------|--------------------------------------------------|
| 597905256-597909732 | TraesCS4A01G299700 | Transmembrane protein                            |
| 597912275-597916528 | TraesCS4A01G299800 | Cationic amino acid transporter, putative        |
| 597917105-597928087 | TraesCS4A01G299900 | Carboxypeptidase                                 |
| 597919165-597920004 | TraesCS4A01G300000 | nuclear pore anchor                              |
| 597943888-597946110 | TraesCS4A01G300100 | Carboxypeptidase                                 |
| 597970675-597971288 | TraesCS4A01G300200 | Carboxypeptidase                                 |
| 598051227-598059177 | TraesCS4A01G300300 | CCR4-NOT transcription complex subunit 3         |
| 598146082-598149543 | TraesCS4A01G300400 | C2 calcium/lipid-binding and GRAM domain protein |
| 598156692-598157063 | TraesCS4A01G300500 | calpain-type cysteine protease family            |
| 598236284-598237934 | TraesCS4A01G300600 | CsAtPR5                                          |
| 598240305-598241658 | TraesCS4A01G300700 | Phospholipase A1                                 |
| 598245669-598247060 | TraesCS4A01G300800 | Phospholipase A1                                 |
| 598294664-598296479 | TraesCS4A01G300900 | Phospholipase A1                                 |
| 598417709-598418041 | TraesCS4A01G301000 | Transducin/WD40 repeat-like superfamily protein  |
| 598435208-598437212 | TraesCS4A01G301100 | Phosphate transporter                            |
| 598451057-598451640 | TraesCS4A01G301200 | Zinc finger protein 512B family                  |
| 598453191-598455202 | TraesCS4A01G301300 | UDP-N-acetylmuramate--L-alanine ligase           |

---

---

|                     |                    |                                                                                |
|---------------------|--------------------|--------------------------------------------------------------------------------|
| 598516610-598516873 | TraesCS4A01G301400 | syntaxin of plants 41                                                          |
| 598583700-598584248 | TraesCS4A01G301500 | Formate-dependent phosphoribosylglycinamide formyltransferase                  |
| 598590265-598592108 | TraesCS4A01G301600 | Methyltransferase                                                              |
| 598601370-598603264 | TraesCS4A01G301700 | Xylose isomerase 1                                                             |
| 598607823-598609741 | TraesCS4A01G301800 | kinase with adenine nucleotide alpha hydrolases-like domain-containing protein |
| 598712564-598716142 | TraesCS4A01G301900 | Polyadenylation and cleavage factor                                            |
| 598719419-598726719 | TraesCS4A01G302000 | Protein kinase family protein                                                  |
| 598730760-598732038 | TraesCS4A01G302100 | DUF868 family protein (DUF868)                                                 |
| 598761093-598763505 | TraesCS4A01G302200 | Histidine-containing phosphotransfer protein                                   |
| 598778564-598781535 | TraesCS4A01G302300 | Histidine-containing phosphotransfer protein                                   |
| 598791728-598805534 | TraesCS4A01G302400 | Histidine-containing phosphotransfer protein                                   |
| 598807712-598810145 | TraesCS4A01G302500 | Histidine-containing phosphotransfer protein                                   |
| 598813075-598815848 | TraesCS4A01G302600 | Histidine-containing phosphotransfer protein                                   |
| 599082111-599084563 | TraesCS4A01G302700 | Histidine-containing phosphotransfer protein                                   |
| 599098473-599102373 | TraesCS4A01G302800 | Histidine-containing phosphotransfer protein                                   |
| 599123334-599125774 | TraesCS4A01G302900 | Histidine-containing phosphotransfer protein                                   |

---

---

|                     |                    |                                                      |
|---------------------|--------------------|------------------------------------------------------|
| 599156292-599158592 | TraesCS4A01G303000 | Histidine-containing phosphotransfer protein         |
| 599219291-599223173 | TraesCS4A01G303100 | Histidine-containing phosphotransfer protein         |
| 599245371-599247813 | TraesCS4A01G303200 | Histidine-containing phosphotransfer protein         |
| 599318185-599321542 | TraesCS4A01G303300 | Monodehydroascorbate reductase                       |
| 599321764-599326557 | TraesCS4A01G303400 | Aldo-keto reductase/ oxidoreductase                  |
| 599348646-599351947 | TraesCS4A01G303500 | Histidine-containing phosphotransfer protein         |
| 599467504-599470183 | TraesCS4A01G303600 | GDSL esterase/lipase                                 |
| 599586672-599586953 | TraesCS4A01G303700 | 50S ribosomal protein L23                            |
| 599587932-599588347 | TraesCS4A01G303800 | UDP-N-acetylglucosamine 1-carboxyvinyltransferase    |
| 599611950-599613428 | TraesCS4A01G303900 | 3-ketoacyl-CoA synthase                              |
| 599620398-599621905 | TraesCS4A01G304000 | HXXXD-type acyl-transferase family protein, putative |
| 599628039-599630576 | TraesCS4A01G304100 | Histidine-containing phosphotransfer protein         |
| 599643580-599646362 | TraesCS4A01G304200 | Histidine-containing phosphotransfer protein         |
| 599729672-599732995 | TraesCS4A01G304300 | GDSL esterase/lipase                                 |
| 599842221-599846313 | TraesCS4A01G304400 | Fatty acyl-CoA reductase                             |
| 599887495-599892991 | TraesCS4A01G304500 | Protein HIRA                                         |
| 599893273-599897686 | TraesCS4A01G304600 | GDSL esterase/lipase                                 |

---

---

|                     |                    |                    |                                                                  |
|---------------------|--------------------|--------------------|------------------------------------------------------------------|
| 600387015-600387904 |                    | TraesCS4A01G304700 | GDSL esterase/lipase                                             |
| 600465221-600466069 |                    | TraesCS4A01G304800 | F-box domain containing protein                                  |
| 600515322-600517013 |                    | TraesCS4A01G304900 | Gag polyprotein                                                  |
| 600557899-600558255 |                    | TraesCS4A01G305000 | acetyl Co-enzyme a carboxylase carboxyltransferase alpha subunit |
| 600562291-600562677 |                    | TraesCS4A01G305100 | PP2C protein (Clade A protein phosphatases type 2C)              |
| 600623641-600624018 |                    | TraesCS4A01G305200 | Voltage-dependent calcium channel gamma-3 subunit                |
| 600898793-600901403 |                    | TraesCS4A01G305300 | Ribosomal protein                                                |
| 600902966-600906006 |                    | TraesCS4A01G305400 | R3h domain containing protein, putative                          |
| 600912003-600913370 |                    | TraesCS4A01G305500 | Leucine-rich repeat receptor-like protein kinase family protein  |
| 600913413-600914954 | C1                 | TraesCS4A01G305600 | Leucine-rich repeat receptor-like protein kinase family protein  |
| 600917368-600917668 | <i>AX109895154</i> |                    |                                                                  |
| 600918067-600918777 | C2                 | TraesCS4A01G305700 | Leucine-rich repeat receptor-like protein kinase family protein  |
| 600918976-600919929 |                    | TraesCS4A01G305800 | Leucine-rich repeat receptor-like protein kinase family protein  |
| 600973780-600976674 |                    | TraesCS4A01G305900 | Leucine-rich repeat receptor-like protein kinase family protein  |
| 601006374-601007264 |                    | TraesCS4A01G306000 | Leucine-rich repeat receptor-like protein kinase family protein  |
| 601015641-601018036 |                    | TraesCS4A01G306100 | Leucine-rich repeat receptor-like protein kinase family protein  |
| 601032932-601035720 |                    | TraesCS4A01G306200 | Leucine-rich repeat receptor-like protein kinase family protein  |

---

---

|                     |                    |                                                          |
|---------------------|--------------------|----------------------------------------------------------|
| 601039945-601041268 | TraesCS4A01G306300 | Sulfate adenylyltransferase subunit 2                    |
| 601042166-601044648 | TraesCS4A01G306400 | Nuclear transcription factor Y subunit B                 |
| 601059795-601062569 | TraesCS4A01G306500 | Ubiquitin                                                |
| 601156437-601157280 | TraesCS4A01G306600 | Germin-like protein                                      |
| 601170067-601170582 | TraesCS4A01G306700 | Germin-like protein                                      |
| 601178223-601178885 | TraesCS4A01G306800 | Germin-like protein                                      |
| 601180599-601181212 | TraesCS4A01G306900 | Germin-like protein                                      |
| 601194129-601194761 | TraesCS4A01G307000 | Germin-like protein                                      |
| 601196302-601197426 | TraesCS4A01G307100 | 40S ribosomal protein S25, putative                      |
| 601243050-601248526 | TraesCS4A01G307200 | Hexosyltransferase                                       |
| 601276423-601279582 | TraesCS4A01G307300 | Copper ion-binding protein                               |
| 601283765-601284744 | TraesCS4A01G307400 | Dirigent protein                                         |
| 601309805-601313807 | TraesCS4A01G307500 | Receptor protein kinase, putative                        |
| 601337777-601338814 | TraesCS4A01G307600 | Cytochrome P450 family protein, expressed                |
| 601338817-601339314 | TraesCS4A01G307700 | Cytochrome P450 family protein, expressed                |
| 601356729-601357874 | TraesCS4A01G307800 | Haloacid dehalogenase-like hydrolase superfamily protein |
| 601364149-601367728 | TraesCS4A01G307900 | Beta-amylase                                             |

---



---

|                     |                    |                                                                         |
|---------------------|--------------------|-------------------------------------------------------------------------|
| 601691310-601691909 | TraesCS4A01G308000 | DNA-directed RNA polymerase subunit                                     |
| 601721962-601724493 | TraesCS4A01G308100 | Queuine tRNA-ribosyltransferase                                         |
| 602053534-602061759 | TraesCS4A01G308200 | ABC transporter G family member                                         |
| 602106173-602113523 | TraesCS4A01G308300 | NBS-LRR disease resistance protein-like protein                         |
| 602114965-602118639 | TraesCS4A01G308400 | Sn1-specific diacylglycerol lipase alpha                                |
| 602131245-602131586 | TraesCS4A01G308500 | Endosperm transfer cell specific PR9                                    |
| 602248955-602250749 | TraesCS4A01G308600 | Cytochrome P450 family protein, expressed                               |
| 602260036-602261169 | TraesCS4A01G308700 | 2-oxoglutarate (2OG) and Fe(II)-dependent oxygenase superfamily protein |
| 602269708-602272129 | TraesCS4A01G308800 | Cytochrome P450                                                         |
| 602272639-602274102 | TraesCS4A01G308900 | Glycosyltransferase                                                     |
| 602306511-602307929 | TraesCS4A01G309000 | Glycosyltransferase                                                     |
| 602379677-602381627 | TraesCS4A01G309100 | F-box family protein                                                    |
| 602621396-602653205 | TraesCS4A01G309200 | receptor kinase 1                                                       |
| 602797611-602798738 | TraesCS4A01G309300 | Cysteine protease-like protein                                          |
| 602863275-602864408 | TraesCS4A01G309400 | 2-oxoglutarate (2OG) and Fe(II)-dependent oxygenase superfamily protein |
| 602870810-602873131 | TraesCS4A01G309500 | NBS-LRR-like resistance protein                                         |
| 602873144-602875409 | TraesCS4A01G309600 | NBS-LRR-like resistance protein                                         |

---

---

|                     |                    |                                                                         |
|---------------------|--------------------|-------------------------------------------------------------------------|
| 602898874-602900427 | TraesCS4A01G309700 | Disease resistance protein RGA2                                         |
| 602951973-602952419 | TraesCS4A01G309800 | nucleolar-like protein                                                  |
| 603030535-603031895 | TraesCS4A01G309900 | Wall-associated receptor kinase 2                                       |
| 603031991-603032776 | TraesCS4A01G310000 | Receptor-like protein kinase                                            |
| 603034418-603038171 | TraesCS4A01G310100 | Receptor-like protein kinase                                            |
| 603043878-603048236 | TraesCS4A01G310200 | Disease resistance protein (NBS-LRR class) family                       |
| 603124352-603125053 | TraesCS4A01G310300 | Ta11-like non-LTR retrotransposon                                       |
| 603281751-603283618 | TraesCS4A01G310400 | ACT domain-containing protein                                           |
| 603340065-603340286 | TraesCS4A01G310500 | Powder tolerance-related protein                                        |
| 603372855-603375220 | TraesCS4A01G310600 | PsbP-like protein 1                                                     |
| 603377077-603380232 | TraesCS4A01G310700 | C2H2-like zinc finger protein, putative                                 |
| 603382876-603384074 | TraesCS4A01G310800 | Protein kinase, putative                                                |
| 603389076-603390446 | TraesCS4A01G310900 | F-box family protein                                                    |
| 603405890-603409736 | TraesCS4A01G311000 | 2-oxoglutarate (2OG) and Fe(II)-dependent oxygenase superfamily protein |
| 603446017-603450038 | TraesCS4A01G311100 | Poly(A) RNA polymerase GLD2-A                                           |
| 603451508-603455462 | TraesCS4A01G311200 | RING/U-box superfamily protein                                          |
| 603458896-603462620 | TraesCS4A01G311300 | Phosphate transporter                                                   |

---

---

|                     |                    |                                                             |
|---------------------|--------------------|-------------------------------------------------------------|
| 603464816-603468137 | TraesCS4A01G311400 | Short-chain dehydrogenase/reductase family protein          |
| 603469204-603469938 | TraesCS4A01G311500 | F-box family protein                                        |
| 603481988-603482257 | TraesCS4A01G311600 | Histone H2B                                                 |
| 603487771-603490362 | TraesCS4A01G311700 | ACT domain-containing protein                               |
| 603497203-603499122 | TraesCS4A01G311800 | Protein UPSTREAM OF FLC                                     |
| 603504251-603504949 | TraesCS4A01G311900 | Antimicrobial peptide MBP-1 related (LEM1)                  |
| 603506946-603507572 | TraesCS4A01G312000 | TRAF-like superfamily protein                               |
| 603511086-603513774 | TraesCS4A01G312100 | Hydroxyproline-rich glycoprotein family protein             |
| 603531246-603533012 | TraesCS4A01G312200 | mesoderm induction early response protein                   |
| 603533796-603535084 | TraesCS4A01G312300 | Calcium-dependent lipid-binding domain protein              |
| 603539694-603540551 | TraesCS4A01G312400 | AT hook motif DNA-binding family protein                    |
| 603634761-603635540 | TraesCS4A01G312500 | LOB domain-containing protein, putative                     |
| 603637548-603638907 | TraesCS4A01G312600 | Peptidyl-prolyl cis-trans isomerase                         |
| 603666136-603667011 | TraesCS4A01G312700 | Aquaporin-like protein                                      |
| 603674525-603681868 | TraesCS4A01G312800 | Disease resistance protein (NBS-LRR class) family           |
| 603698121-603703864 | TraesCS4A01G312900 | Disease resistance protein (NBS-LRR class) family           |
| 603705420-603706858 | TraesCS4A01G313000 | Retrovirus-related Pol polyprotein from transposon TNT 1-94 |

---

---

|                     |                    |                                                                                   |
|---------------------|--------------------|-----------------------------------------------------------------------------------|
| 603726600-603729539 | TraesCS4A01G313100 | Leucine-rich repeat receptor-like protein kinase family protein                   |
| 603980200-603981915 | TraesCS4A01G313200 | Flavin-containing monooxygenase                                                   |
| 604055487-604056041 | TraesCS4A01G313300 | AWPM-19-like membrane family protein                                              |
| 604068519-604069061 | TraesCS4A01G313400 | AWPM-19-like membrane family protein                                              |
| 604076529-604093392 | TraesCS4A01G313500 | Myosin                                                                            |
| 604101314-604103592 | TraesCS4A01G313600 | Ubiquitin-conjugating enzyme E2                                                   |
| 604104116-604105207 | TraesCS4A01G313700 | 2-oxoglutarate (2OG) and Fe(II)-dependent oxygenase superfamily protein, putative |
| 604107899-604111305 | TraesCS4A01G313800 | B3 domain-containing protein                                                      |
| 604208547-604211960 | TraesCS4A01G313900 | Receptor-like protein kinase                                                      |
| 604594773-604595687 | TraesCS4A01G314000 | 2-oxoglutarate (2OG) and Fe(II)-dependent oxygenase superfamily protein           |
| 604659700-604661064 | TraesCS4A01G314100 | Anthocyanin 5-aromatic acyltransferase                                            |
| 604672359-604672679 | TraesCS4A01G314200 | Receptor-like kinase                                                              |
| 604772917-604775106 | TraesCS4A01G314300 | Disease resistance protein RPM1                                                   |
| 604847255-604850213 | TraesCS4A01G314400 | Disease resistance protein RPM1                                                   |
| 604856722-604857722 | TraesCS4A01G314500 | Ethylene-responsive transcription factor                                          |
| 604940612-604941666 | TraesCS4A01G314600 | Ethylene-responsive transcription factor                                          |

---

---

|                     |                    |                                                                      |
|---------------------|--------------------|----------------------------------------------------------------------|
| 605011157-605019060 | TraesCS4A01G314700 | BTB/POZ/MATH-domain protein                                          |
| 605024348-605027787 | TraesCS4A01G314800 | transcription factor, putative (Protein of unknown function, DUF547) |
| 605085385-605087313 | TraesCS4A01G314900 | Sugar transporter, putative                                          |
| 605135482-605137364 | TraesCS4A01G315000 | Serine/threonine-protein phosphatase                                 |
| 605559706-605576513 | TraesCS4A01G315100 | Protein kinase                                                       |
| 605640606-605646822 | TraesCS4A01G315200 | OTU domain-containing protein                                        |
| 605644790-605646059 | TraesCS4A01G315300 | Trihelix transcription factor                                        |
| 605650689-605651247 | TraesCS4A01G315400 | Early nodulin-like protein                                           |
| 605656378-605659792 | TraesCS4A01G315500 | 60 kDa chaperonin                                                    |
| 605663621-605667985 | TraesCS4A01G315600 | Mediator of RNA polymerase II transcription subunit 15a              |
| 605711438-605714093 | TraesCS4A01G315700 | RNA polymerase sigma factor                                          |
| 605717729-605733179 | TraesCS4A01G315800 | Mediator of RNA polymerase II transcription subunit 13               |
| 605744972-605749290 | TraesCS4A01G315900 | ABC transporter G family member                                      |
| 606116328-606116585 | TraesCS4A01G316000 | Cytoplasmic polyadenylation element-binding protein 4                |
| 606339516-606340395 | TraesCS4A01G316100 | F-box family protein                                                 |
| 606344404-606347550 | TraesCS4A01G316200 | Heavy metal-associated protein                                       |
| 606361307-606365891 | TraesCS4A01G316300 | La-related protein                                                   |

---

---

|                     |                    |                                                                                    |
|---------------------|--------------------|------------------------------------------------------------------------------------|
| 606370348-606374153 | TraesCS4A01G316400 | GDSL esterase/lipase                                                               |
| 606397501-606401304 | TraesCS4A01G316500 | GDSL esterase/lipase                                                               |
| 606411251-606412810 | TraesCS4A01G316600 | Protein DETOXIFICATION                                                             |
| 606523492-606525117 | TraesCS4A01G316700 | Avr9/Cf-9 rapidly elicited protein                                                 |
| 606536601-606541208 | TraesCS4A01G316800 | WD40 repeat-containing protein                                                     |
| 606586469-606587515 | TraesCS4A01G316900 | phosphotransferases/inositol or phosphatidylinositol kinase                        |
| 606591102-606591425 | TraesCS4A01G317000 | Bifunctional inhibitor/lipid-transfer protein/seed storage 2S albumin-like protein |
| 606593204-606593985 | TraesCS4A01G317100 | DNA translocase FtsK                                                               |
| 606608746-606609752 | TraesCS4A01G317200 | Harpin-induced protein 1 (Hin1), putative                                          |
| 606644043-606645527 | TraesCS4A01G317300 | Galactose-6-phosphate isomerase subunit LacB                                       |
| 606647800-606648237 | TraesCS4A01G317400 | Mannonate dehydratase                                                              |
| 606761195-606779668 | TraesCS4A01G317500 | Kinase family protein                                                              |
| 606796975-606806270 | TraesCS4A01G317600 | Kinase family protein                                                              |
| 606811790-606812212 | TraesCS4A01G317700 | Oxidoreductase/transition metal ion-binding protein                                |
| 607045527-607055050 | TraesCS4A01G317800 | Exportin-1                                                                         |
| 607177428-607178300 | TraesCS4A01G317900 | Cytokinin riboside 5'-monophosphate phosphoribohydrolase                           |

---

---

|                     |                 |                    |                                                                 |
|---------------------|-----------------|--------------------|-----------------------------------------------------------------|
| 607178925-607179542 |                 | TraesCS4A01G318000 | Plant invertase/pectin methylesterase inhibitor superfamily     |
| 607261315-607262061 |                 | TraesCS4A01G318100 | Cytokinin riboside 5'-monophosphate phosphoribohydrolase        |
| 607270018-607270363 |                 | TraesCS4A01G318200 | F-box only 46                                                   |
| 607271201-607274122 |                 | TraesCS4A01G318300 | Leucine-rich repeat receptor-like protein kinase family protein |
| 607309139-607310644 |                 | TraesCS4A01G318400 | ATP-dependent zinc metalloprotease FtsH                         |
| 607374419-607374938 |                 | TraesCS4A01G318500 | DNA topoisomerase                                               |
| 607378184-607378939 |                 | TraesCS4A01G318600 | EMBRYO SURROUNDING FACTOR 1-like protein 8                      |
| 607417310-607417758 |                 | TraesCS4A01G318700 | Pentatricopeptide repeat-containing protein At1g19720           |
| 607427642-607428537 |                 | TraesCS4A01G318800 | carbohydrate esterase, putative (DUF303)                        |
| 607432191-607434672 |                 | TraesCS4A01G318900 | NAD/NADP-dependent betaine aldehyde dehydrogenase               |
| 607633308-607635652 | C3              | TraesCS4A01G319000 | PGR5-like protein 1A, chloroplastic                             |
| 607888036-607888131 | <i>BV211529</i> |                    |                                                                 |
| 608043668-608044864 |                 | TraesCS4A01G319100 | Gibberellin 20 oxidase                                          |
| 608260037-608261317 |                 | TraesCS4A01G319200 | F-box protein PP2                                               |
| 608267651-608271046 | C4              | TraesCS4A01G319300 | Disease resistance protein (NBS-LRR class) family               |
| 608478075-608481479 |                 | TraesCS4A01G319400 | Disease resistance protein (NBS-LRR class) family               |
| 608554446-608556572 |                 | TraesCS4A01G319500 | Pentatricopeptide repeat-containing protein                     |

---

---

|                     |                    |                                                                         |
|---------------------|--------------------|-------------------------------------------------------------------------|
| 608558256-608560511 | TraesCS4A01G319600 | Coatomer subunit zeta                                                   |
| 608560774-608562889 | TraesCS4A01G319700 | Dehydrogenase/reductase SDR family protein 7-like protein               |
| 608602654-608609084 | TraesCS4A01G319800 | ATP-dependent DNA helicase 2 subunit KU80                               |
| 608610038-608610918 | TraesCS4A01G319900 | Acyl carrier protein                                                    |
| 608828643-608834674 | TraesCS4A01G320000 | Sucrose nonfermenting 4-like protein                                    |
| 608836776-608838380 | TraesCS4A01G320100 | 2-oxoglutarate (2OG) and Fe(II)-dependent oxygenase superfamily protein |
| 608866790-608868195 | TraesCS4A01G320200 | Ribosome hibernation promotion factor                                   |
| 608879224-608880208 | TraesCS4A01G320300 | DNA-(apurinic or apyrimidinic site) lyase                               |
| 608881132-608882197 | TraesCS4A01G320400 | F-box protein PP2                                                       |
| 608983186-608987723 | TraesCS4A01G320500 | Outer envelope pore protein 24B, chloroplastic                          |
| 608990462-608990752 | TraesCS4A01G320600 | RADIALIS-like transcription factor                                      |
| 609070959-609072655 | TraesCS4A01G320700 | F-box protein                                                           |
| 609080072-609084634 | TraesCS4A01G320800 | WRKY transcription factor                                               |
| 609132923-609133702 | TraesCS4A01G320900 | RING/U-box superfamily protein                                          |
| 609182691-609183530 | TraesCS4A01G321000 | Protein YIPF                                                            |
| 609416867-609417226 | TraesCS4A01G321100 | Retrotransposon protein, putative, unclassified, expressed              |
| 609564170-609566524 | TraesCS4A01G321200 | RING/U-box superfamily protein, putative                                |

---



---

|                     |                    |                                                     |
|---------------------|--------------------|-----------------------------------------------------|
| 609804687-609807321 | TraesCS4A01G321300 | Poly [ADP-ribose] polymerase                        |
| 609815821-609818981 | TraesCS4A01G321400 | Beta-fructofuranosidase, insoluble protein          |
| 609917868-609922743 | TraesCS4A01G321500 | Beta-fructofuranosidase, insoluble protein          |
| 609926193-609929495 | TraesCS4A01G321600 | Beta-fructofuranosidase, insoluble protein          |
| 610034075-610036709 | TraesCS4A01G321700 | Cell wall invertase                                 |
| 610041237-610042322 | TraesCS4A01G321800 | Xyloglucan endotransglucosylase/hydrolase           |
| 610089743-610090656 | TraesCS4A01G321900 | F-box family protein                                |
| 610130944-610132777 | TraesCS4A01G322000 | F-box family protein                                |
| 610250073-610252980 | TraesCS4A01G322100 | SPFH domain/band 7 family protein                   |
| 610261683-610263056 | TraesCS4A01G322200 | Myb factor                                          |
| 610484185-610490550 | TraesCS4A01G322300 | Heat shock transcription factor family protein      |
| 610493560-610496978 | TraesCS4A01G322400 | RNA-binding family protein, putative                |
| 610497225-610500400 | TraesCS4A01G322500 | Polyribonucleotide nucleotidyltransferase, putative |
| 610618883-610629153 | TraesCS4A01G322600 | E3 ubiquitin-protein ligase listerin                |
| 610640193-610642379 | TraesCS4A01G322700 | F-box family protein                                |
| 610706805-610709026 | TraesCS4A01G322800 | F-box family protein                                |
| 610816015-610818670 | TraesCS4A01G322900 | F-box family protein                                |

---

---

|                     |                    |                                                             |
|---------------------|--------------------|-------------------------------------------------------------|
| 611025042-611028000 | TraesCS4A01G323000 | F-box family protein                                        |
| 611029706-611030686 | TraesCS4A01G323100 | Retrovirus-related Pol polyprotein from transposon TNT 1-94 |
| 611071297-611073599 | TraesCS4A01G323200 | F-box family protein                                        |
| 611201294-611203594 | TraesCS4A01G323300 | F-box family protein                                        |
| 611264184-611266257 | TraesCS4A01G323400 | Receptor protein kinase, putative                           |
| 611268602-611271640 | TraesCS4A01G323500 | Protein kinase                                              |
| 611278023-611278475 | TraesCS4A01G323600 | 30S ribosomal protein S9                                    |
| 611579698-611583177 | TraesCS4A01G323700 | ADP-ribosylation factor GTPase-activating protein           |
| 611592308-611592874 | TraesCS4A01G323800 | AIG2-like (Avirulence induced gene) family protein          |
| 611656148-611656933 | TraesCS4A01G323900 | WPP domain associated protein                               |
| 611687436-611690317 | TraesCS4A01G324000 | Protein BCCIP homolog                                       |
| 611932162-611935806 | TraesCS4A01G324100 | ATP-dependent Clp protease ATP-binding subunit              |
| 611976530-611977103 | TraesCS4A01G324200 | ATP-dependent Clp protease ATP-binding subunit ClpB         |
| 612040266-612041864 | TraesCS4A01G324300 | Anthocyanin 3'-O-beta-glucosyltransferase                   |
| 612059812-612061668 | TraesCS4A01G324400 | Transmembrane 70, mitochondrial                             |
| 612062177-612065071 | TraesCS4A01G324500 | GC-rich sequence DNA-binding factor 1                       |
| 612072756-612078364 | TraesCS4A01G324600 | Ribonuclease P protein subunit P38, related protein         |

---

---

|                     |                    |                                                           |
|---------------------|--------------------|-----------------------------------------------------------|
| 612079125-612084522 | TraesCS4A01G324700 | Protein BREVIS RADIX                                      |
| 612110333-612114060 | TraesCS4A01G324800 | Cleavage and polyadenylation specificity factor subunit 3 |
| 612372451-612392100 | TraesCS4A01G324900 | Methyl-CpG-binding domain-containing protein 9            |
| 612426443-612433137 | TraesCS4A01G325000 | Ankyrin repeat family protein                             |
| 612442435-612443827 | TraesCS4A01G325100 | Methyl-CpG-binding domain-containing protein 9            |
| 612531673-612533481 | TraesCS4A01G325200 | F-box family protein                                      |
| 613266770-613268275 | TraesCS4A01G325300 | Pentatricopeptide repeat-containing protein               |
| 613268358-613271776 | TraesCS4A01G325400 | Flavin-containing monooxygenase                           |
| 613319821-613321985 | TraesCS4A01G325500 | Ycf20-like protein                                        |
| 613322410-613325605 | TraesCS4A01G325600 | Tumor necrosis factor receptor superfamily member 21      |
| 613330067-613333466 | TraesCS4A01G325700 | Receptor-like protein kinase                              |
| 613367368-613367595 | TraesCS4A01G325800 | Hydroxyproline-rich glycoprotein                          |
| 613398947-613400085 | TraesCS4A01G325900 | Protein kinase family protein                             |
| 613401832-613406707 | TraesCS4A01G326000 | Nuclear factor Y, putative                                |
| 613412237-613416220 | TraesCS4A01G326100 | Derlin                                                    |
| 613417884-613419340 | TraesCS4A01G326200 | Pentatricopeptide repeat-containing protein, putative     |
| 613422860-613423415 | TraesCS4A01G326300 | Hydroxyproline-rich glycoprotein family protein           |

---

---

|                     |                    |                                                  |
|---------------------|--------------------|--------------------------------------------------|
| 613543523-613544365 | TraesCS4A01G326400 | Ethylene-responsive transcription factor         |
| 613559481-613562327 | TraesCS4A01G326500 | Epstein-Barr virus EBNA-1-like protein           |
| 613568109-613568616 | TraesCS4A01G326600 | Hydroxyproline-rich glycoprotein family protein  |
| 613581481-613582994 | TraesCS4A01G326700 | Acyl-[acyl-carrier-protein] desaturase           |
| 613606291-613615092 | TraesCS4A01G326800 | Transducin/WD-like repeat-protein                |
| 613667357-613668904 | TraesCS4A01G326900 | Organic cation/carnitine transporter             |
| 613697285-613704538 | TraesCS4A01G327000 | carboxyl-terminal peptidase, putative (DUF239)   |
| 613740671-613742242 | TraesCS4A01G327100 | Receptor-like protein kinase                     |
| 613742362-613744101 | TraesCS4A01G327200 | Leucine-rich repeat receptor kinase-like protein |
| 613765165-613767888 | TraesCS4A01G327300 | Disease resistance protein RPM1                  |
| 613804119-613812765 | TraesCS4A01G327400 | carboxyl-terminal peptidase, putative (DUF239)   |
| 613816530-613819414 | TraesCS4A01G327500 | Protein transport protein Sec61 subunit alpha    |
| 613855345-613861730 | TraesCS4A01G327600 | carboxyl-terminal peptidase, putative (DUF239)   |
| 613996678-613998876 | TraesCS4A01G327700 | Transposon protein, putative, Mutator sub-class  |
| 613999134-613999892 | TraesCS4A01G327800 | Transposon protein, putative, Mutator sub-class  |
| 614004317-614006188 | TraesCS4A01G327900 | Tropinone reductase-like protein                 |
| 614014654-614016256 | TraesCS4A01G328000 | Tropinone reductase-like protein                 |

---

---

|                     |                    |                                                      |
|---------------------|--------------------|------------------------------------------------------|
| 614018608-614019552 | TraesCS4A01G328100 | Aspartic proteinase nepenthesin-1                    |
| 614027490-614029756 | TraesCS4A01G328200 | Pantothenate synthetase                              |
| 614029976-614030492 | TraesCS4A01G328300 | mechanosensitive channel of small conductance-like 9 |
| 614031503-614033643 | TraesCS4A01G328400 | Pentatricopeptide repeat-containing protein          |
| 614101649-614103184 | TraesCS4A01G328500 | Pentatricopeptide repeat-containing protein          |
| 614106743-614108525 | TraesCS4A01G328600 | Ankyrin repeat domain protein, putative              |
| 614111306-614116597 | TraesCS4A01G328700 | Transducin/WD-like repeat-protein                    |
| 614228693-614230620 | TraesCS4A01G328800 | Laccase                                              |
| 614241223-614243111 | TraesCS4A01G328900 | cobalt ion-binding protein                           |
| 614244840-614247194 | TraesCS4A01G329000 | FRIGIDA-like protein, putative                       |
| 614252518-614258300 | TraesCS4A01G329100 | Disease resistance protein (NBS-LRR class) family    |
| 614401759-614406887 | TraesCS4A01G329200 | Protein ZINC INDUCED FACILITATOR-LIKE 1              |
| 614411595-614415624 | TraesCS4A01G329300 | U2 small nuclear ribonucleoprotein A                 |
| 614416477-614426973 | TraesCS4A01G329400 | E3 ubiquitin-protein ligase SspH2                    |
| 614609275-614612070 | TraesCS4A01G329500 | DEAD-box ATP-dependent RNA helicase 52A              |
| 614867396-614871236 | TraesCS4A01G329600 | 26S proteasome non-ATPase regulatory subunit         |
| 614906939-614908430 | TraesCS4A01G329700 | F-box family protein                                 |

---

---

|                     |                    |                                                                             |
|---------------------|--------------------|-----------------------------------------------------------------------------|
| 615032206-615040140 | TraesCS4A01G329800 | Protein kinase family protein                                               |
| 615099611-615101105 | TraesCS4A01G329900 | F-box family protein                                                        |
| 615104066-615106167 | TraesCS4A01G330000 | protein kinase family protein                                               |
| 615106331-615107512 | TraesCS4A01G330100 | Leucine-rich repeat receptor-like protein kinase family protein             |
| 615193675-615198039 | TraesCS4A01G330200 | Monothiol glutaredoxin                                                      |
| 615205524-615209815 | TraesCS4A01G330300 | Glutaredoxin                                                                |
| 615212565-615216245 | TraesCS4A01G330400 | Elongation factor Tu                                                        |
| 615219045-615222583 | TraesCS4A01G330500 | BED zinc finger,hAT family dimerization domain                              |
| 615362649-615364826 | TraesCS4A01G330600 | F-box/RNI-like/FBD-like domains-containing protein                          |
| 615372042-615372374 | TraesCS4A01G330700 | Rust resistance-like protein RP1                                            |
| 615437069-615439255 | TraesCS4A01G330800 | Shikimate dehydrogenase (NADP(+))                                           |
| 615445461-615447633 | TraesCS4A01G330900 | LRR-RLK                                                                     |
| 615455264-615457337 | TraesCS4A01G331000 | F-box family protein                                                        |
| 615694100-615702325 | TraesCS4A01G331100 | Pleiotropic drug resistance ABC transporter                                 |
| 615941151-615942218 | TraesCS4A01G331200 | Dolichyl-diphosphooligosaccharide--protein glycosyltransferase subunit DAD1 |
| 615969199-615971265 | TraesCS4A01G331300 | Cytochrome b                                                                |

---

---

|                     |                    |                                                             |
|---------------------|--------------------|-------------------------------------------------------------|
| 616086874-616109275 | TraesCS4A01G331400 | meristematic receptor-like kinase                           |
| 616229091-616229877 | TraesCS4A01G331500 | F-box domain containing protein                             |
| 616230369-616234110 | TraesCS4A01G331600 | Alcohol dehydrogenase-like protein                          |
| 616236683-616237678 | TraesCS4A01G331700 | F-box domain containing protein                             |
| 616305755-616306168 | TraesCS4A01G331800 | 18S pre-ribosomal assembly protein gar2-like protein        |
| 616310241-616313839 | TraesCS4A01G331900 | Cinnamoyl-CoA reductase 4                                   |
| 616501029-616501661 | TraesCS4A01G332000 | Serrate RNA effector molecule homolog                       |
| 616507393-616508992 | TraesCS4A01G332100 | Nascent polypeptide-associated complex subunit beta         |
| 616611347-616612869 | TraesCS4A01G332200 | F-box and associated interaction domains-containing protein |
| 616617242-616618711 | TraesCS4A01G332300 | F-box family protein                                        |
| 616662076-616664226 | TraesCS4A01G332400 | F-box family protein                                        |
| 616673096-616674421 | TraesCS4A01G332500 | F-box domain containing protein, expressed                  |
| 616700796-616703444 | TraesCS4A01G332600 | FBD-associated F-box protein                                |
| 616839912-616876772 | TraesCS4A01G332700 | F-box and associated interaction domains-containing protein |
| 616875589-616876473 | TraesCS4A01G332800 | F-box domain containing protein                             |
| 616884760-616886057 | TraesCS4A01G332900 | F-box and associated interaction domains-containing protein |
| 616896068-616897536 | TraesCS4A01G333000 | F-box family protein                                        |

---

---

|                     |                    |                                                           |
|---------------------|--------------------|-----------------------------------------------------------|
| 616900752-616903264 | TraesCS4A01G333100 | F-box family protein                                      |
| 616961344-616961814 | TraesCS4A01G333200 | Basic blue protein, putative                              |
| 616977285-616977749 | TraesCS4A01G333300 | Basic blue protein                                        |
| 616981393-616985103 | TraesCS4A01G333400 | Transferase, transferring glycosyl groups                 |
| 617001184-617002438 | TraesCS4A01G333500 | Sec14p-like phosphatidylinositol transfer family protein  |
| 617042496-617050788 | TraesCS4A01G333600 | Sec14p-like phosphatidylinositol transfer family protein  |
| 617049263-617049826 | TraesCS4A01G333700 | Ethylene-responsive transcription factor                  |
| 617094599-617097896 | TraesCS4A01G333800 | Sec14p-like phosphatidylinositol transfer family protein  |
| 617230785-617234228 | TraesCS4A01G333900 | KH domain-containing protein                              |
| 617281529-617282683 | TraesCS4A01G334000 | Glycine rich protein 3                                    |
| 617288987-617290506 | TraesCS4A01G334100 | Glycine rich protein 3                                    |
| 617349130-617350011 | TraesCS4A01G334200 | Glycine rich protein 3                                    |
| 617360412-617361293 | TraesCS4A01G334300 | Glycine rich protein 3                                    |
| 617445072-617446375 | TraesCS4A01G334400 | Integral membrane protein                                 |
| 617652694-617654247 | TraesCS4A01G334500 | Sucrose transporter                                       |
| 617657626-617659105 | TraesCS4A01G334600 | U3 small nucleolar RNA-associated protein 18-like protein |
| 617849876-617853865 | TraesCS4A01G334700 | Actin-related protein 2/3 complex subunit 4               |

---



---

|                     |                    |                                                               |
|---------------------|--------------------|---------------------------------------------------------------|
| 617856078-617859609 | TraesCS4A01G334800 | B-cell receptor-associated protein 31-like containing protein |
| 617907195-617912173 | TraesCS4A01G334900 | Protein kinase family protein                                 |
| 617924650-617927527 | TraesCS4A01G335000 | lectin-receptor kinase                                        |
| 617930763-617932013 | TraesCS4A01G335100 | Zinc finger MYM-type-like protein                             |
| 617933919-617940601 | TraesCS4A01G335200 | Protein kinase family protein                                 |
| 617942110-617944974 | TraesCS4A01G335300 | RPM1-interacting protein 4                                    |
| 617945575-617951208 | TraesCS4A01G335400 | Conserved oligomeric Golgi complex subunit 2                  |
| 618084665-618089234 | TraesCS4A01G335500 | NBS-LRR disease resistance protein                            |
| 618121544-618125040 | TraesCS4A01G335600 | NBS-LRR-like resistance protein                               |
| 618158574-618175415 | TraesCS4A01G335700 | receptor kinase 1                                             |
| 618265643-618275366 | TraesCS4A01G335800 | Ankyrin repeat family protein                                 |
| 618411430-618413166 | TraesCS4A01G335900 | Pirin-like protein                                            |
| 618417500-618419188 | TraesCS4A01G336000 | Pirin-like protein                                            |
| 618463034-618464665 | TraesCS4A01G336100 | Pirin-like protein                                            |
| 618528523-618530057 | TraesCS4A01G336200 | Pirin-like protein                                            |
| 618564906-618567847 | TraesCS4A01G336300 | Nuclear RNA binding protein, putative                         |
| 618620274-618627946 | TraesCS4A01G336400 | Long-chain-fatty-acid CoA ligase, putative                    |

---

---

|                     |                    |                                                                |
|---------------------|--------------------|----------------------------------------------------------------|
| 618660637-618674099 | TraesCS4A01G336500 | Long-chain-fatty-acid CoA ligase, putative                     |
| 619147079-619160948 | TraesCS4A01G336600 | Cleavage and polyadenylation specificity factor subunit 3      |
| 619181209-619181706 | TraesCS4A01G336700 | B3 domain-containing protein                                   |
| 619184361-619188525 | TraesCS4A01G336800 | Kinase-like protein                                            |
| 619278543-619284761 | TraesCS4A01G336900 | Ubiquitin carboxyl-terminal hydrolase-related protein          |
| 619312282-619312990 | TraesCS4A01G337000 | CRIB domain-containing protein RIC4                            |
| 619333716-619334321 | TraesCS4A01G337100 | CRIB domain-containing protein RIC4                            |
| 619370063-619370655 | TraesCS4A01G337200 | ROP-interactive CRIB motif protein                             |
| 619372946-619375424 | TraesCS4A01G337300 | UDP-4-amino-4-deoxy-L-arabinose--oxoglutarate aminotransferase |
| 619582736-619583677 | TraesCS4A01G337400 | U3 small nucleolar RNA-associated protein 18-like protein      |
| 619590939-619591567 | TraesCS4A01G337500 | Serine/threonine-protein phosphatase 7 long form like          |
| 619686152-619686415 | TraesCS4A01G337600 | RING/FYVE/PHD-type zinc finger family protein                  |
| 619948588-619950250 | TraesCS4A01G337700 | U3 small nucleolar RNA-associated protein 18-like protein      |
| 620189006-620194905 | TraesCS4A01G337800 | Aspartokinase                                                  |
| 620260277-620261490 | TraesCS4A01G337900 | zinc finger/BTB domain protein, putative (DUF1644)             |
| 620289827-620290336 | TraesCS4A01G338000 | Invertase inhibitor                                            |
| 620323514-620325316 | TraesCS4A01G338100 | Pectinesterase                                                 |

---

---

|                     |                 |                    |                                          |
|---------------------|-----------------|--------------------|------------------------------------------|
| 638240325-638241099 | C6              | TraesCS4A01G365100 | SHAGGY-like kinase                       |
| 638661695-638661817 | <i>Xgpw2331</i> |                    |                                          |
| 638791957-638796803 | C7              | TraesCS4A01G365200 | Sn1-specific diacylglycerol lipase alpha |

---
